# Supplementary material for: Chiral sensors for determining the absolute configurations of α-amino acid derivatives
Source: Royal Society of Chemistry journal article supplement (doi:10.1039/c8ob01933a), 2018-01-01
Supplement: c8ob01933a1.pdf [file c8ob01933a1.pdf]

Supplementary Information:

## Chiral sensors for determining the absolute configurations of $\alpha$ -amino acids derivatives

Zhongxiang Chen,<sup>ab</sup> Hongjun Fan,<sup>c</sup> Shiwei Yang,<sup>ab</sup> Guangling Bian<sup>\*,ab</sup> and Ling Song<sup>\*,ab</sup>

<sup>a</sup>. *The Key Laboratory of Coal to Ethylene Glycol and Its Related Technology, Fujian Institute of Research on the Structure of Matter, Chinese Academy of Sciences, Fuzhou, Fujian 350002, P. R. China.*

<sup>b</sup>. *University of Chinese Academy of Sciences, 100049, Beijing, P. R. China.*

<sup>c</sup>. *The State Key Lab of Molecular Reaction Dynamics, Dalian Institute of Chemical Physics, Chinese Academy of Sciences, Dalian, 116023, P. R. China.*

*Tel: +86(591)63173117, Fax +86(591)63173117.*

*E-mail: [gfb@fjirsm.ac.cn](mailto:gfb@fjirsm.ac.cn); [songling@fjirsm.ac.cn](mailto:songling@fjirsm.ac.cn)*

|                                                                                                                     |    |
|---------------------------------------------------------------------------------------------------------------------|----|
| Figure S1: <sup>1</sup> H NMR (400 MHz, TMS) of ( <i>R</i> )-CSA 1, DABCO and N-Pht- $\alpha$ -amino acid 1 .....   | 3  |
| Figure S2: <sup>1</sup> H NMR (400 MHz, TMS) of ( <i>S</i> )-CSA 1, DABCO and N-Pht- $\alpha$ -amino acid 1 .....   | 3  |
| Figure S3: <sup>1</sup> H NMR (400 MHz, TMS) of ( <i>R</i> )-CSA 1, DABCO and N-Pht- $\alpha$ -amino acid 2 .....   | 4  |
| Figure S4: <sup>1</sup> H NMR (400 MHz, TMS) of ( <i>S</i> )-CSA 1, DABCO and N-Pht- $\alpha$ -amino acid 2 .....   | 4  |
| Figure S5: <sup>1</sup> H NMR (400 MHz, TMS) of ( <i>R</i> )-CSA 1, DABCO and N-Pht- $\alpha$ -amino acid 3 .....   | 5  |
| Figure S6: <sup>1</sup> H NMR (400 MHz, TMS) of ( <i>S</i> )-CSA 1, DABCO and N-Pht- $\alpha$ -amino acid 3.....    | 5  |
| Figure S7: <sup>1</sup> H NMR (400 MHz, TMS) of ( <i>R</i> )-CSA 1, DABCO and N-Pht- $\alpha$ -amino acid 4 .....   | 6  |
| Figure S8: <sup>1</sup> H NMR (400 MHz, TMS) of ( <i>S</i> )-CSA 1, DABCO and N-Pht- $\alpha$ -amino acid 4.....    | 6  |
| Figure S9: <sup>1</sup> H NMR (400 MHz, TMS) of ( <i>R</i> )-CSA 1, DABCO and N-Pht- $\alpha$ -amino acid 5 .....   | 7  |
| Figure S10: <sup>1</sup> H NMR (400 MHz, TMS) of ( <i>S</i> )-CSA 1, DABCO and N-Pht- $\alpha$ -amino acid 5.....   | 7  |
| Figure S11: <sup>1</sup> H NMR (400 MHz, TMS) of ( <i>R</i> )-CSA 1, DABCO and N-Pht- $\alpha$ -amino acid 6 .....  | 8  |
| Figure S12: <sup>1</sup> H NMR (400 MHz, TMS) of ( <i>S</i> )-CSA 1, DABCO and N-Pht- $\alpha$ -amino acid 6.....   | 8  |
| Figure S13: <sup>1</sup> H NMR (400 MHz, TMS) of ( <i>R</i> )-CSA 1, DABCO and N-Pht- $\alpha$ -amino acid 7 .....  | 9  |
| Figure S14: <sup>1</sup> H NMR (400 MHz, TMS) of ( <i>S</i> )-CSA 1, DABCO and N-Pht- $\alpha$ -amino acid 7.....   | 9  |
| Figure S15: <sup>1</sup> H NMR (400 MHz, TMS) of ( <i>R</i> )-CSA 1, DABCO and N-Pht- $\alpha$ -amino acid 8 .....  | 10 |
| Figure S16: <sup>1</sup> H NMR (400 MHz, TMS) of ( <i>S</i> )-CSA 1, DABCO and N-Pht- $\alpha$ -amino acid 8.....   | 10 |
| Figure S17: <sup>1</sup> H NMR (400 MHz, TMS) of ( <i>R</i> )-CSA 1, DABCO and N-Pht- $\alpha$ -amino acid 9 .....  | 11 |
| Figure S18: <sup>1</sup> H NMR (400 MHz, TMS) of ( <i>S</i> )-CSA 1, DABCO and N-Pht- $\alpha$ -amino acid 9.....   | 11 |
| Figure S19: <sup>1</sup> H NMR (400 MHz, TMS) of ( <i>R</i> )-CSA 1, DABCO and N-Pht- $\alpha$ -amino acid 10 ..... | 12 |
| Figure S20: <sup>1</sup> H NMR (400 MHz, TMS) of ( <i>S</i> )-CSA 1, DABCO and N-Pht- $\alpha$ -amino acid 10.....  | 12 |

|                                                                                                                     |    |
|---------------------------------------------------------------------------------------------------------------------|----|
| Figure S21. <sup>1</sup> H NMR (400 MHz, TMS) of ( <i>R</i> )-CSA 1, DABCO and N-Pht- $\alpha$ -amino acid 11 ..... | 13 |
| Figure S22. <sup>1</sup> H NMR (400 MHz, TMS) of ( <i>S</i> )-CSA 1, DABCO and N-Pht- $\alpha$ -amino acid 11.....  | 13 |
| Figure S23. <sup>1</sup> H NMR (400 MHz, TMS) of ( <i>R</i> )-CSA 1, DABCO and N-Pht- $\alpha$ -amino acid 12 ..... | 14 |
| Figure S24. <sup>1</sup> H NMR (400 MHz, TMS) of ( <i>S</i> )-CSA 1, DABCO and N-Pht- $\alpha$ -amino acid 12.....  | 14 |
| Figure S25. <sup>1</sup> H NMR (400 MHz, TMS) of ( <i>R</i> )-CSA 1, DABCO and N-Pht- $\alpha$ -amino acid 13 ..... | 15 |
| Figure S26. <sup>1</sup> H NMR (400 MHz, TMS) of ( <i>S</i> )-CSA 1, DABCO and N-Pht- $\alpha$ -amino acid 13.....  | 15 |
| Figure S27. <sup>1</sup> H NMR (400 MHz, TMS) of ( <i>R</i> )-CSA 1, DABCO and N-Pht- $\alpha$ -amino acid 14 ..... | 16 |
| Figure S28. <sup>1</sup> H NMR (400 MHz, TMS) of ( <i>S</i> )-CSA 1, DABCO and N-Pht- $\alpha$ -amino acid 14.....  | 16 |
| Figure S29. <sup>1</sup> H NMR (400 MHz, TMS) of ( <i>R</i> )-CSA 1, DABCO and N-Pht- $\alpha$ -amino acid 15 ..... | 17 |
| Figure S30. <sup>1</sup> H NMR (400 MHz, TMS) of ( <i>S</i> )-CSA 1, DABCO and N-Pht- $\alpha$ -amino acid 15.....  | 17 |
| Figure S31. <sup>1</sup> H NMR (400 MHz, TMS) of ( <i>R</i> )-CSA 1, DABCO and N-Pht- $\alpha$ -amino acid 16 ..... | 18 |
| Figure S32. <sup>1</sup> H NMR (400 MHz, TMS) of ( <i>S</i> )-CSA 1, DABCO and N-Pht- $\alpha$ -amino acid 16.....  | 18 |
| Figure S33. <sup>1</sup> H NMR (400 MHz, TMS) of ( <i>R</i> )-CSA 1, DABCO and N-Pht- $\alpha$ -amino acid 17 ..... | 19 |
| Figure S34. <sup>1</sup> H NMR (400 MHz, TMS) of ( <i>S</i> )-CSA 1, DABCO and N-Pht- $\alpha$ -amino acid 17.....  | 19 |
| Figure S35. <sup>1</sup> H NMR (400 MHz, TMS) of ( <i>R</i> )-CSA 1, DABCO and N-Pht- $\alpha$ -amino acid 18 ..... | 20 |
| Figure S36. <sup>1</sup> H NMR (400 MHz, TMS) of ( <i>S</i> )-CSA 1, DABCO and N-Pht- $\alpha$ -amino acid 18.....  | 20 |
| Figure S37. <sup>1</sup> H NMR (400 MHz, TMS) of ( <i>R</i> )-CSA 1, DABCO and N-Pht- $\alpha$ -amino acid 19 ..... | 21 |
| Figure S38. <sup>1</sup> H NMR (400 MHz, TMS) of ( <i>S</i> )-CSA 1, DABCO and N-Pht- $\alpha$ -amino acid 19.....  | 21 |
| Figure S39. <sup>1</sup> H NMR (400 MHz, TMS) of ( <i>R</i> )-CSA 1, DABCO and N-Pht- $\alpha$ -amino acid 20 ..... | 22 |
| Figure S40. <sup>1</sup> H NMR (400 MHz, TMS) of ( <i>S</i> )-CSA 1, DABCO and N-Pht- $\alpha$ -amino acid 20.....  | 22 |
| Figure S41. <sup>1</sup> H NMR (400 MHz, TMS) of ( <i>R</i> )-CSA 1, DABCO and N-Pht- $\alpha$ -amino acid 21 ..... | 23 |
| Figure S42. <sup>1</sup> H NMR (400 MHz, TMS) of ( <i>S</i> )-CSA 1, DABCO and N-Pht- $\alpha$ -amino acid 21.....  | 23 |
| Figure S43. <sup>1</sup> H NMR (400 MHz, TMS) of ( <i>R</i> )-CSA 1, DABCO and N-Pht- $\alpha$ -amino acid 22 ..... | 24 |
| Figure S44. <sup>1</sup> H NMR (400 MHz, TMS) of ( <i>S</i> )-CSA 1, DABCO and N-Pht- $\alpha$ -amino acid 22.....  | 24 |
| Figure S45. <sup>1</sup> H NMR (400 MHz, TMS) of ( <i>R</i> )-CSA 1, DABCO and N-Pht- $\alpha$ -amino acid 23 ..... | 25 |
| Figure S46. <sup>1</sup> H NMR (400 MHz, TMS) of ( <i>S</i> )-CSA 1, DABCO and N-Pht- $\alpha$ -amino acid 23.....  | 25 |
| Figure S47. <sup>1</sup> H NMR (400 MHz, CDCl <sub>3</sub> , TMS) N-Pht- $\alpha$ -amino acid 10 .....              | 26 |
| Figure S48. <sup>13</sup> C NMR (100 MHz, CDCl <sub>3</sub> , TMS) N-Pht- $\alpha$ -amino acid 10 .....             | 26 |
| Figure S49. <sup>1</sup> H NMR (400 MHz, CDCl <sub>3</sub> , TMS) N-Pht- $\alpha$ -amino acid 22 .....              | 27 |
| Figure S50. <sup>13</sup> C NMR (100 MHz, CDCl <sub>3</sub> , TMS) N-Pht- $\alpha$ -amino acid 22 .....             | 27 |
| Figure S51. <sup>1</sup> H NMR (500 MHz, TMS) of 50 mM ( <i>R</i> )-CSA 1/50 mM L-Pht-Ala /50 mM DABCO .....        | 28 |
| Figure S52. 1D NOESY (500 MHz, TMS) of 50 mM ( <i>R</i> )-CSA 1/50 mM L-Pht-Ala /50 mM DABCO .....                  | 28 |
| Figure S53. <sup>1</sup> H NMR (500 MHz, TMS) of 50 mM ( <i>S</i> )-CSA 1/50 mM L-Pht-Ala/50 mM DABCO               | 29 |
| Figure S54. 1D NOESY (500 MHz, TMS) of 50 mM ( <i>S</i> )-CSA 1/50 mM L-Pht-Ala /50 mM DABCO .....                  | 29 |
| Figure S55. Contrasted 1D NOESY spectra.....                                                                        | 30 |
| Computational models of complexes.....                                                                              | 31 |

Figure S1:  $^1\text{H}$  NMR (400 MHz, TMS) of (*R*)-CSA 1, DABCO and N-Pht- $\alpha$ -amino acid 1

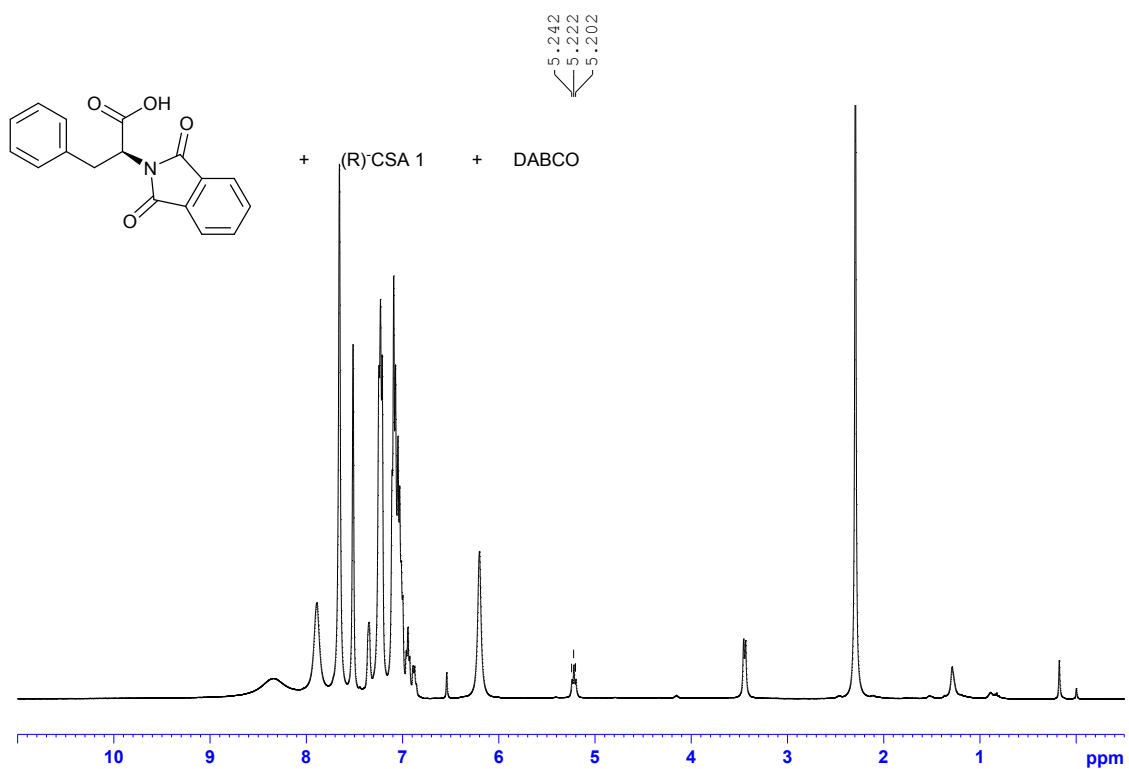

Figure S2:  $^1\text{H}$  NMR (400 MHz, TMS) of (*S*)-CSA 1, DABCO and N-Pht- $\alpha$ -amino acid 1

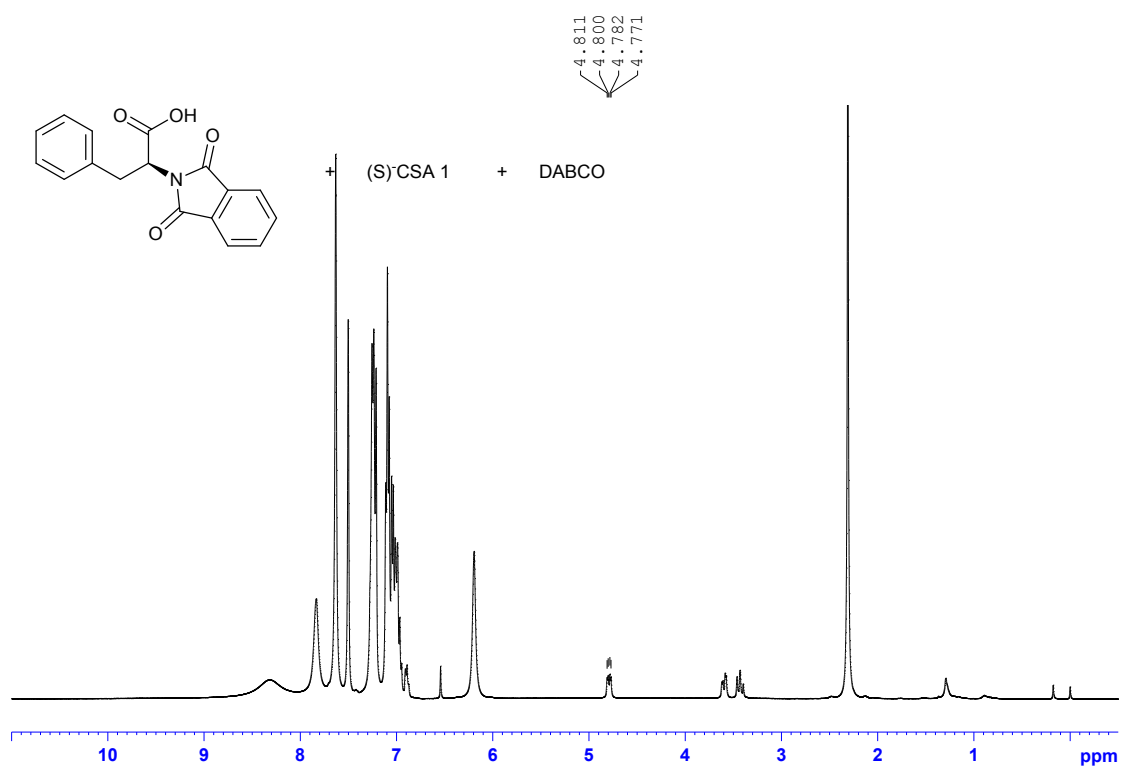

Figure S3:  $^1\text{H}$  NMR (400 MHz, TMS) of (*R*)-CSA 1, DABCO and N-Pht- $\alpha$ -amino acid 2

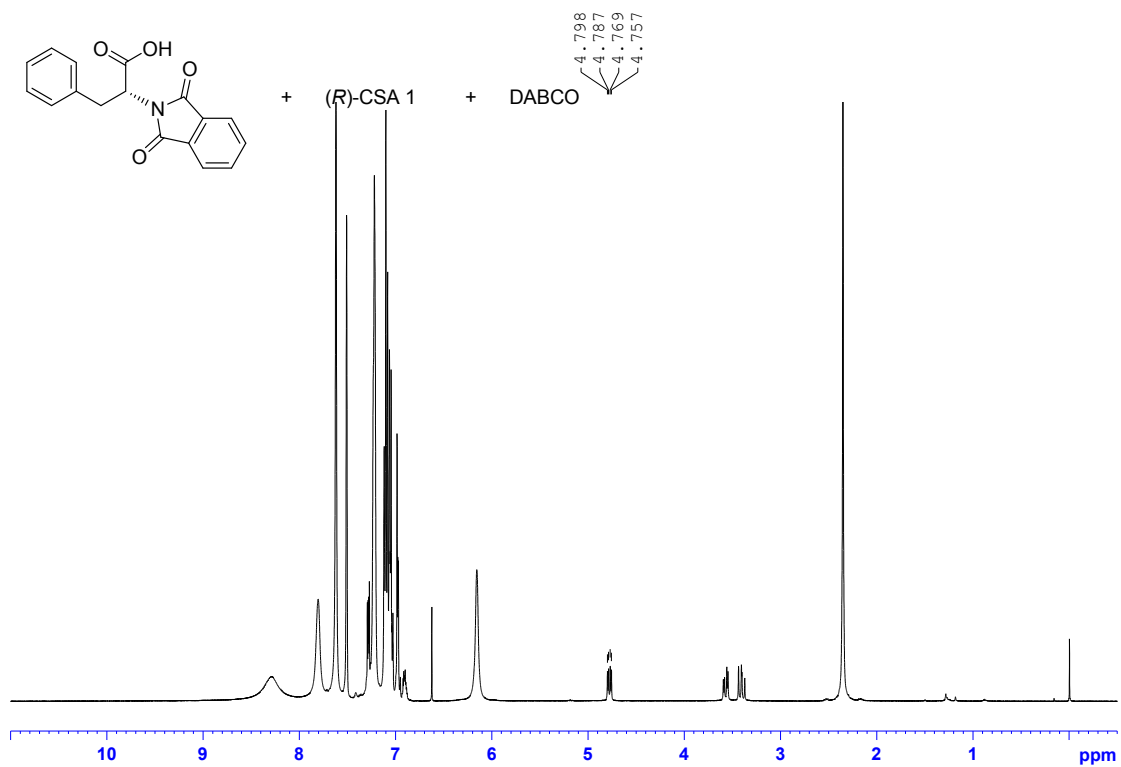

Figure S4:  $^1\text{H}$  NMR (400 MHz, TMS) of (*S*)-CSA 1, DABCO and N-Pht- $\alpha$ -amino acid 2

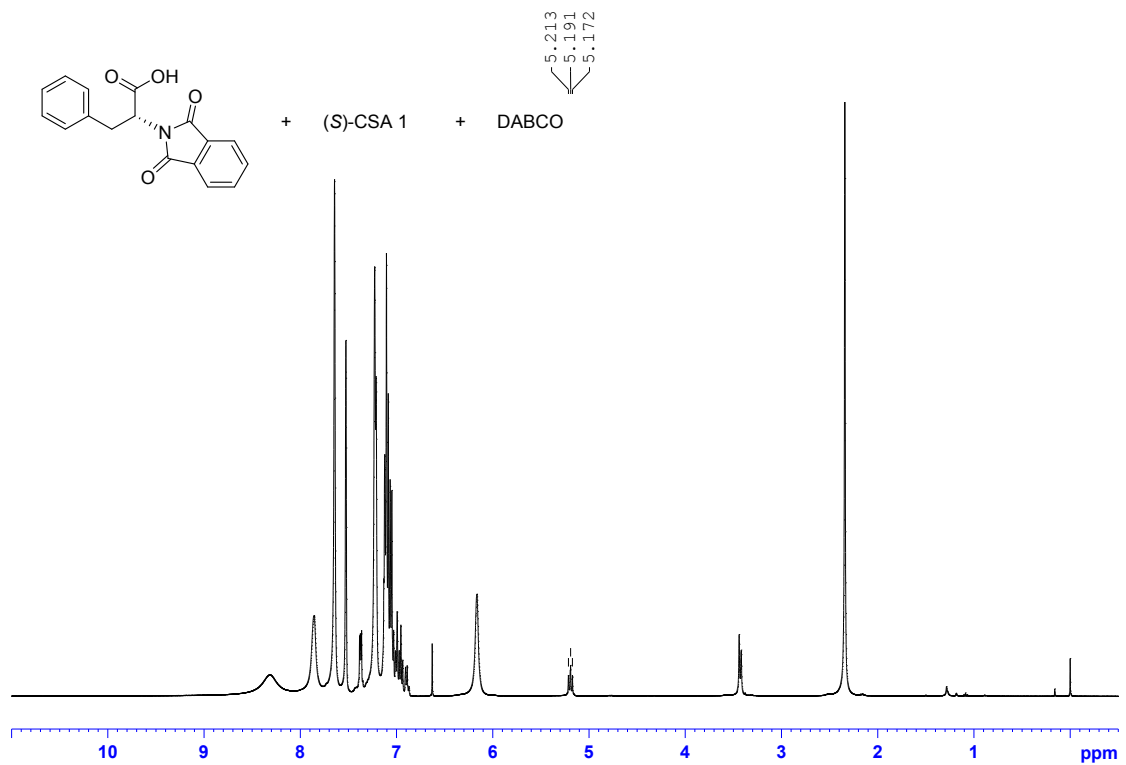

Figure S5.  $^1\text{H}$  NMR (400 MHz, TMS) of (*R*)-CSA 1, DABCO and N-Pht- $\alpha$ -amino acid 3

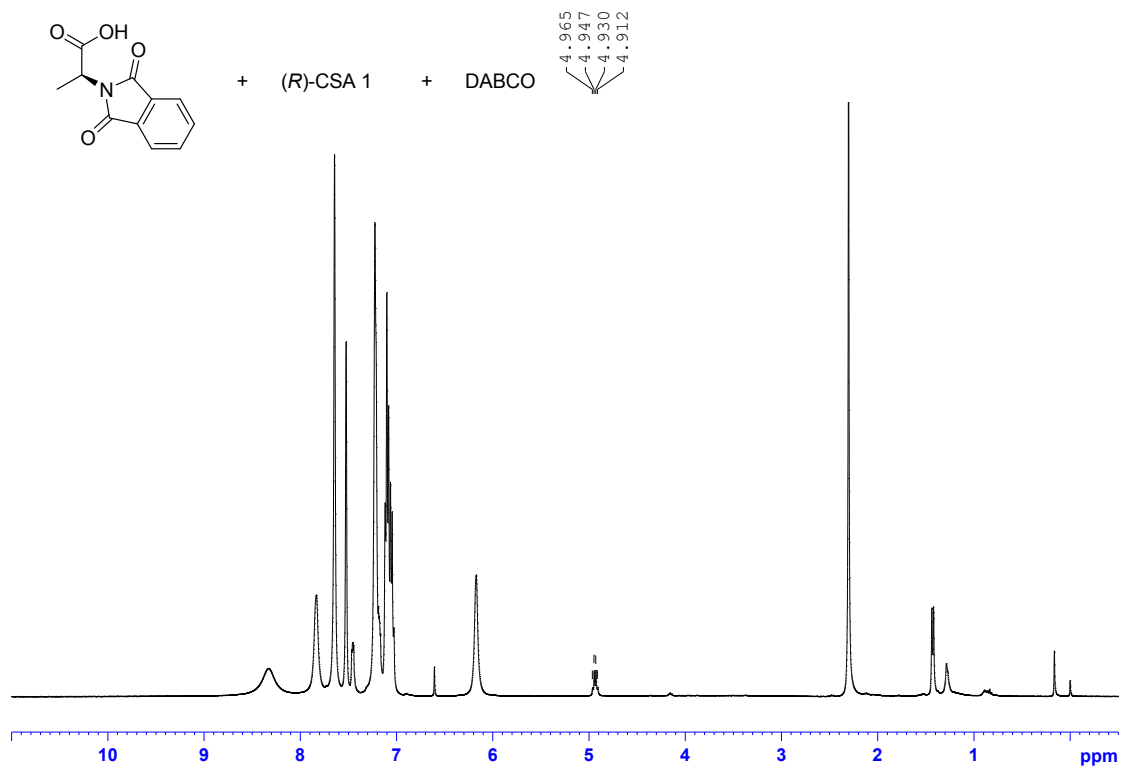

Figure S6.  $^1\text{H}$  NMR (400 MHz, TMS) of (*S*)-CSA 1, DABCO and N-Pht- $\alpha$ -amino acid 3

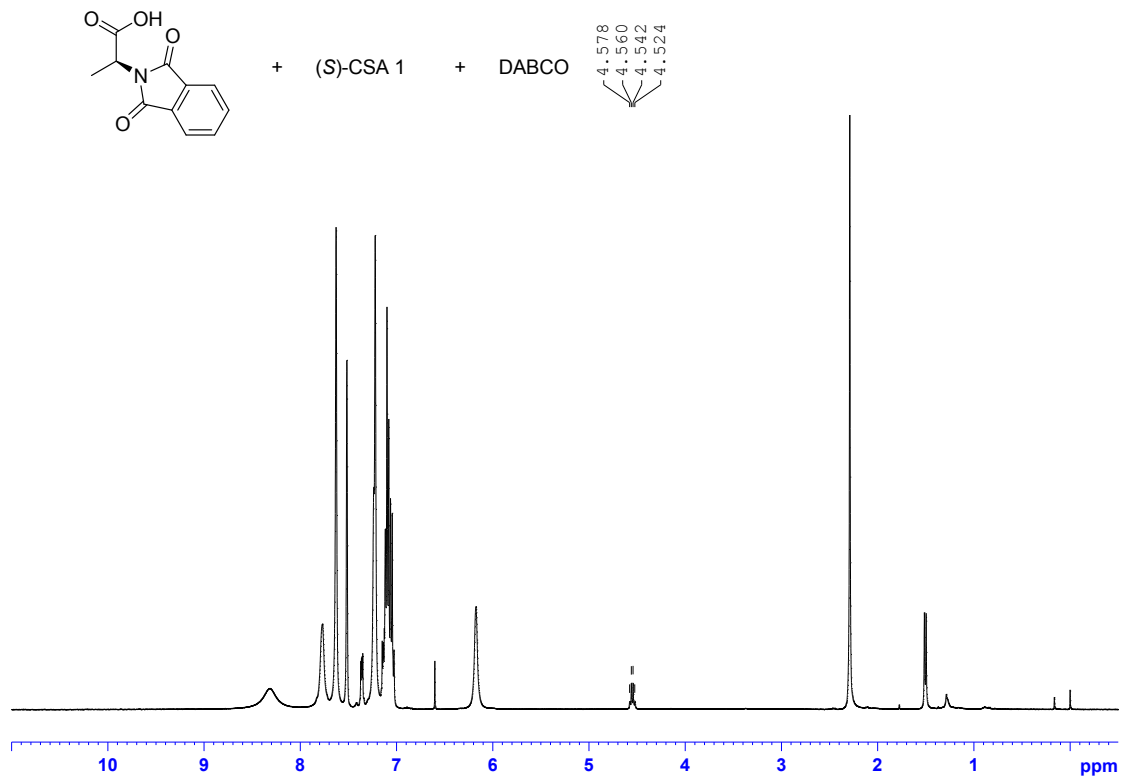

Figure S7. <sup>1</sup>H NMR (400 MHz, TMS) of (R)-CSA 1, DABCO and N-Pht- $\alpha$ -amino acid 4

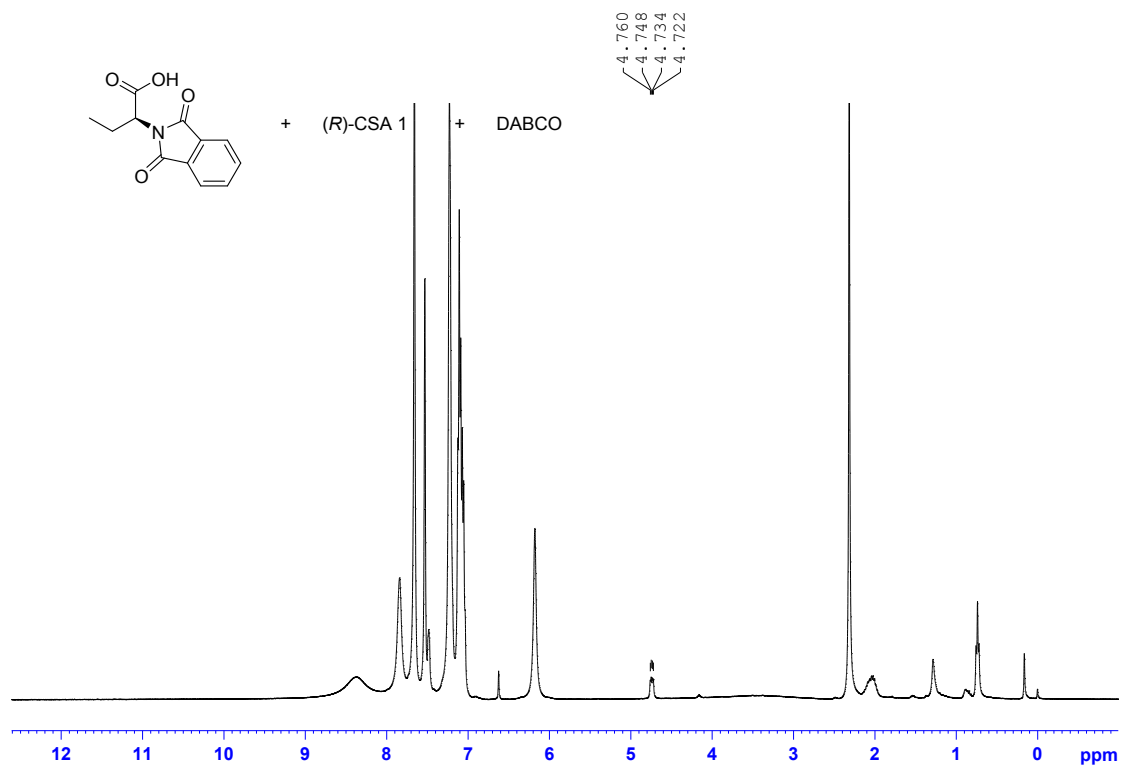

Figure S8. <sup>1</sup>H NMR (400 MHz, TMS) of (S)-CSA 1, DABCO and N-Pht- $\alpha$ -amino acid 4

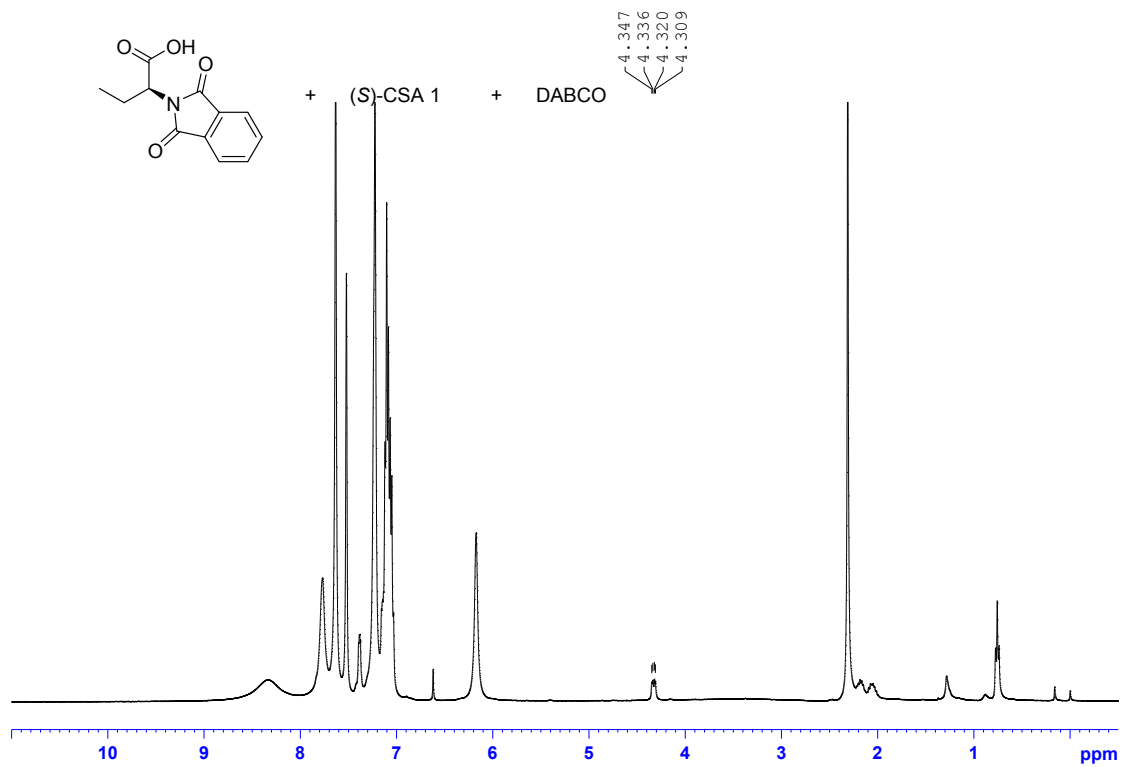

Figure S9. <sup>1</sup>H NMR (400 MHz, TMS) of (R)-CSA 1, DABCO and N-Pht- $\alpha$ -amino acid 5

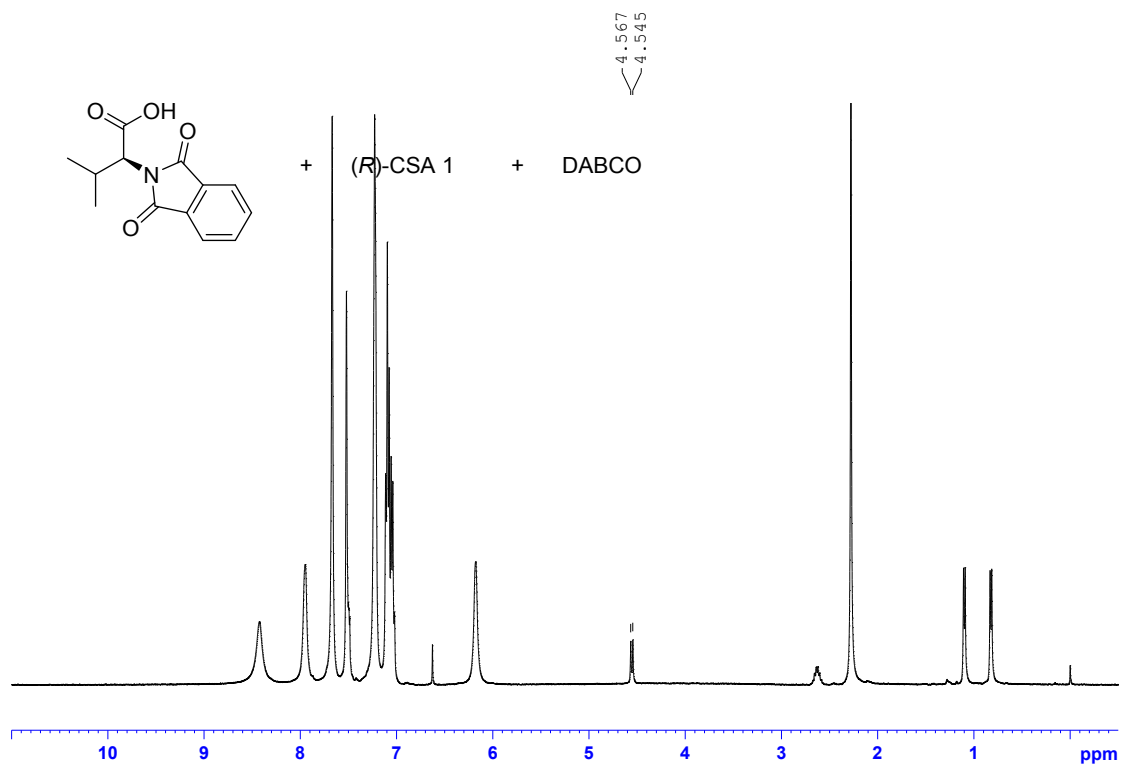

Figure S10. <sup>1</sup>H NMR (400 MHz, TMS) of (S)-CSA 1, DABCO and N-Pht- $\alpha$ -amino acid 5

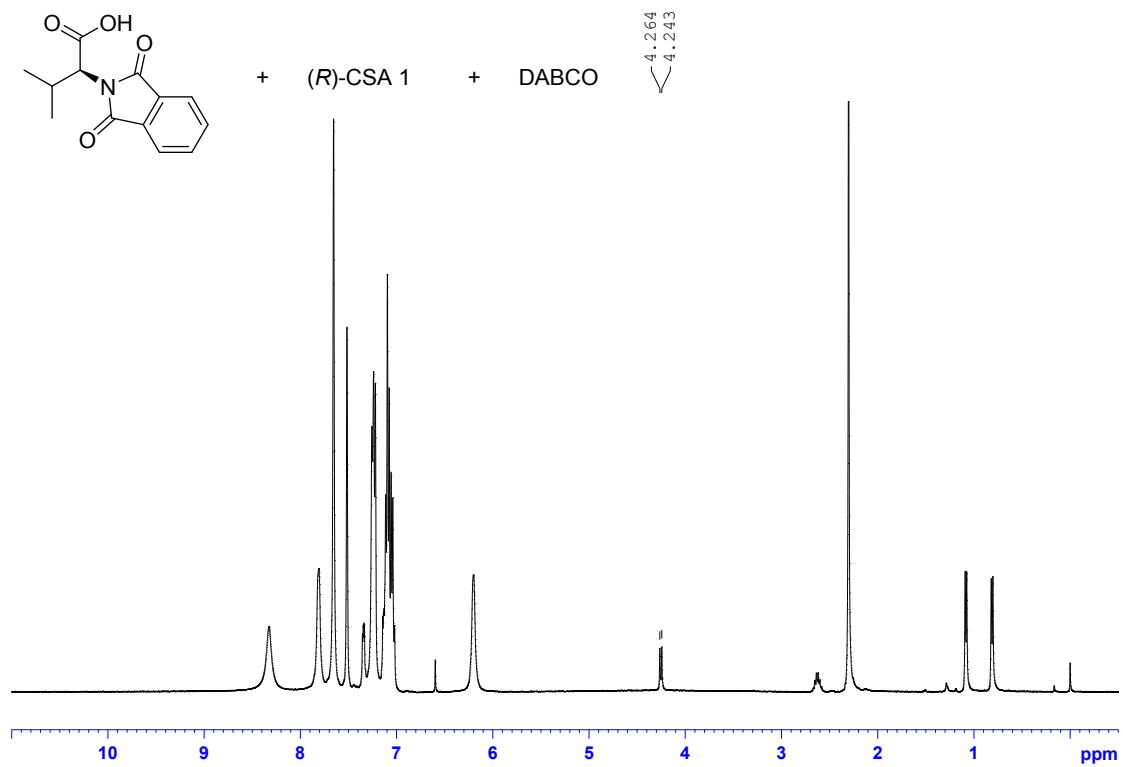

Figure S11. <sup>1</sup>H NMR (400 MHz, TMS) of (R)-CSA 1, DABCO and N-Pht- $\alpha$ -amino acid 6

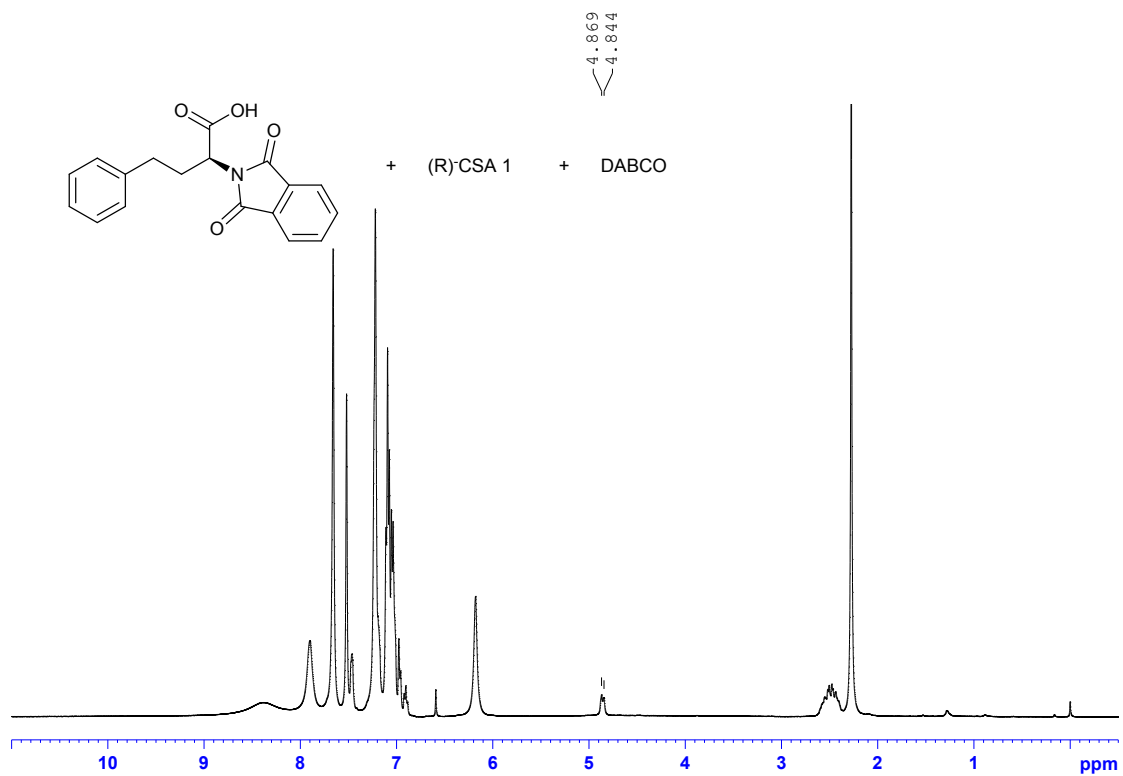

Figure S12. <sup>1</sup>H NMR (400 MHz, TMS) of (S)-CSA 1, DABCO and N-Pht- $\alpha$ -amino acid 6

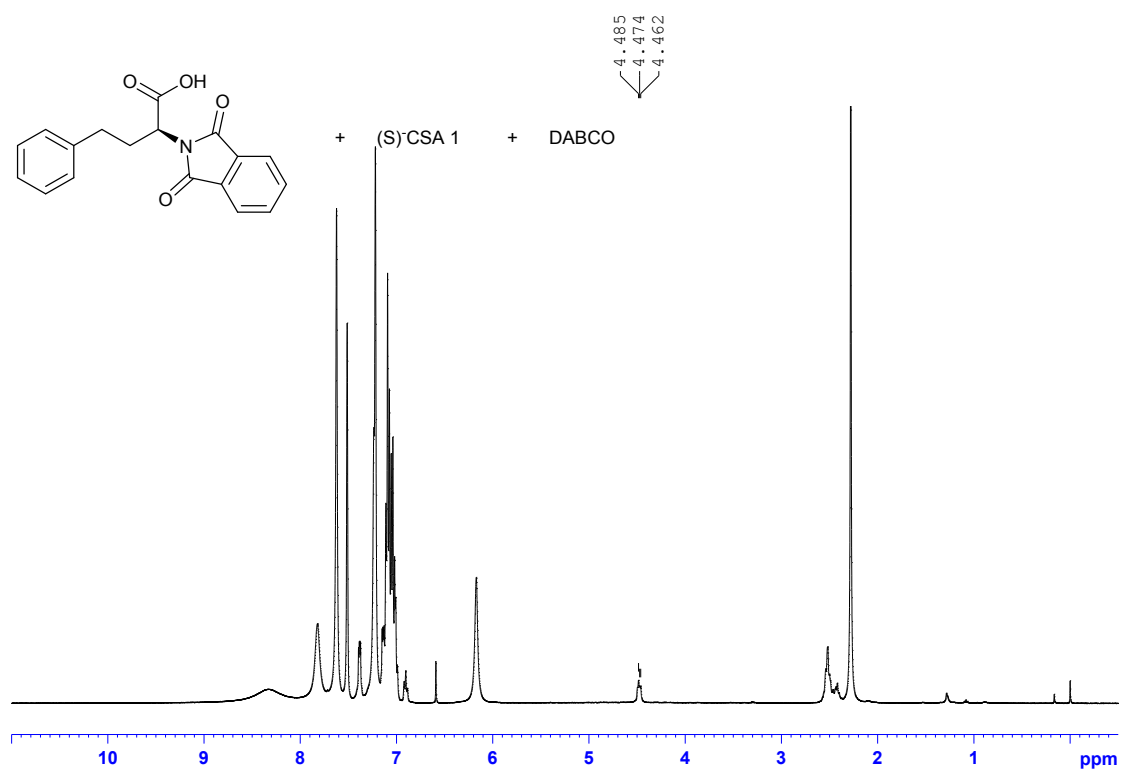



Figure S13. <sup>1</sup>H NMR (400 MHz, TMS) of (R)-CSA 1, DABCO and N-Pht- $\alpha$ -amino acid 7

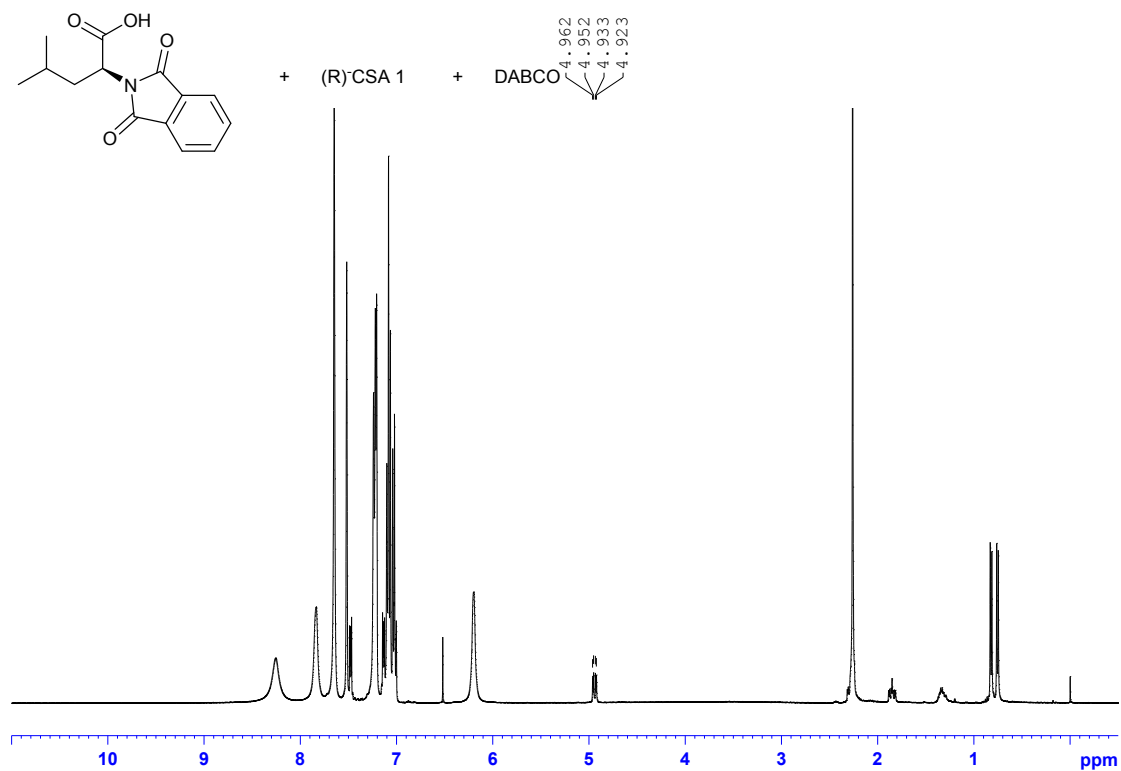

Figure S14. <sup>1</sup>H NMR (400 MHz, TMS) of (S)-CSA 1, DABCO and N-Pht- $\alpha$ -amino acid 7

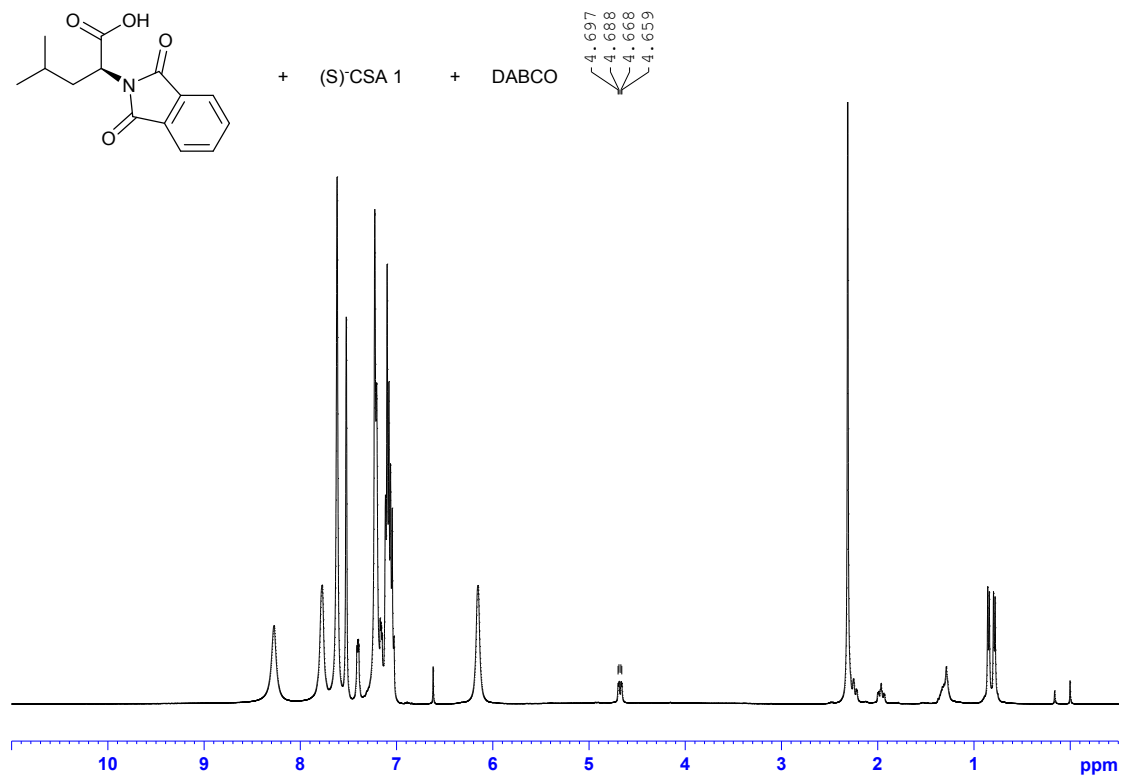

Figure S15. <sup>1</sup>H NMR (400 MHz, TMS) of (R)-CSA 1, DABCO and N-Pht- $\alpha$ -amino acid 8

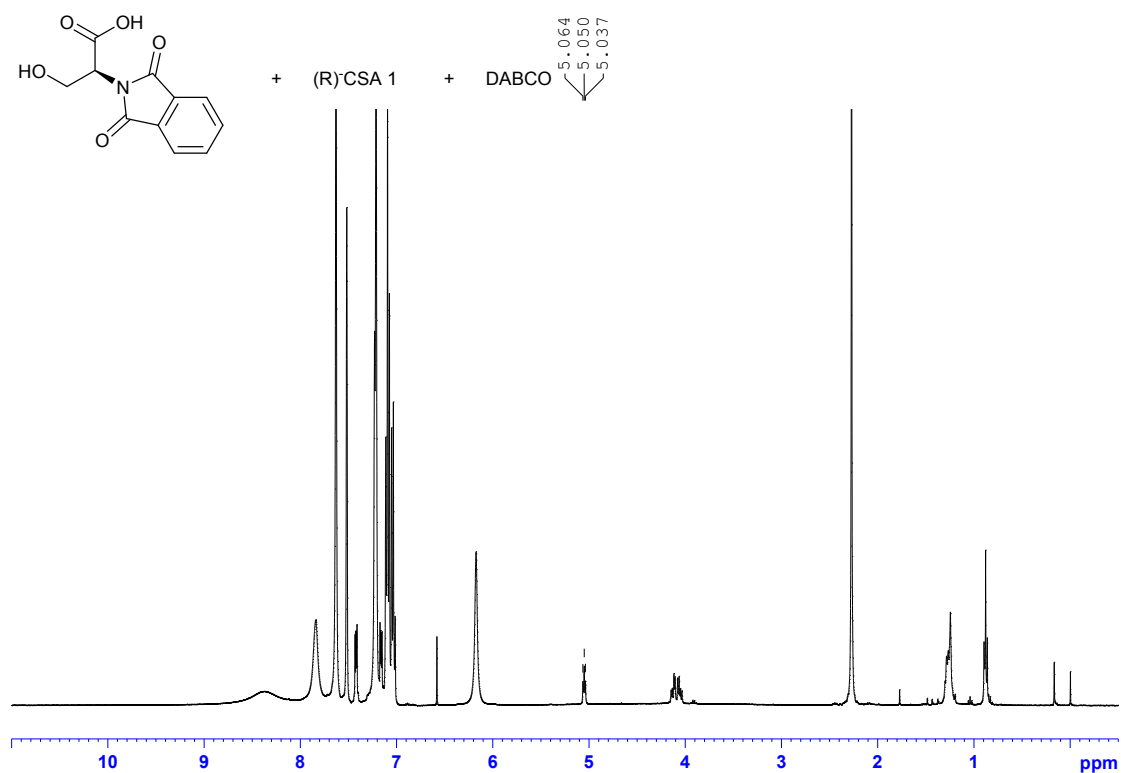

Figure S16. <sup>1</sup>H NMR (400 MHz, TMS) of (S)-CSA 1, DABCO and N-Pht- $\alpha$ -amino acid 8

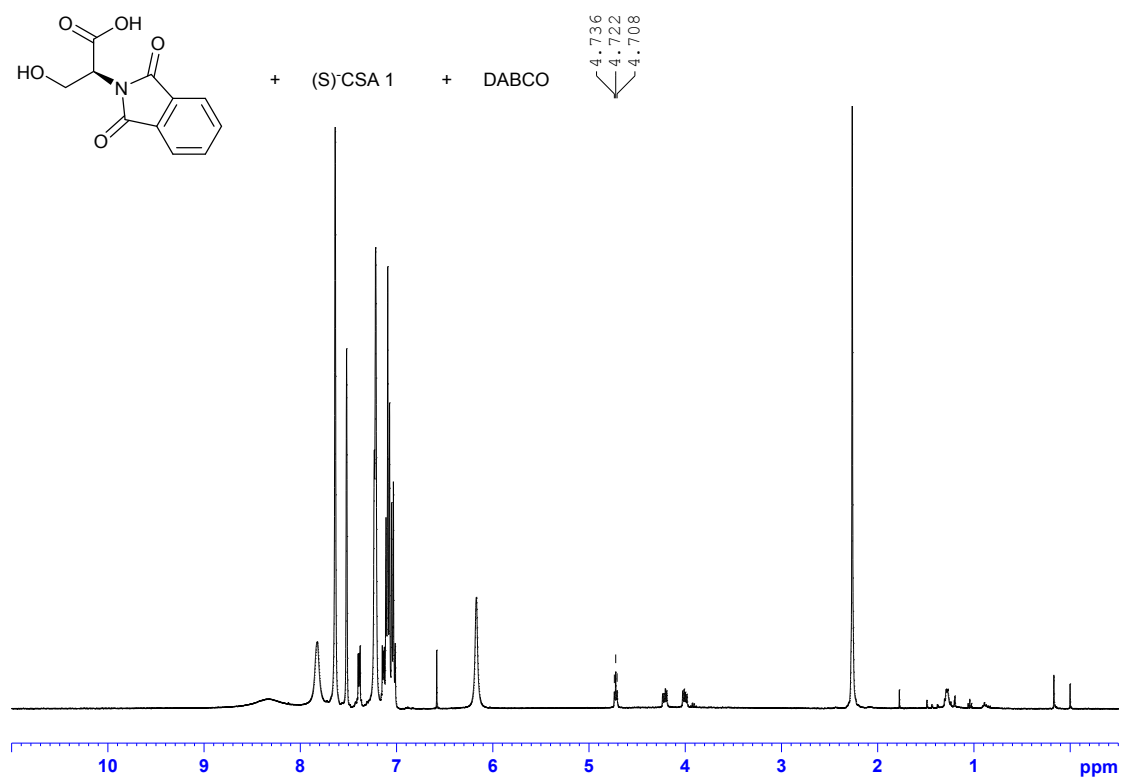

Figure S17.  $^1\text{H}$  NMR (400 MHz, TMS) of (*R*)-CSA 1, DABCO and N-Pht- $\alpha$ -amino acid 9

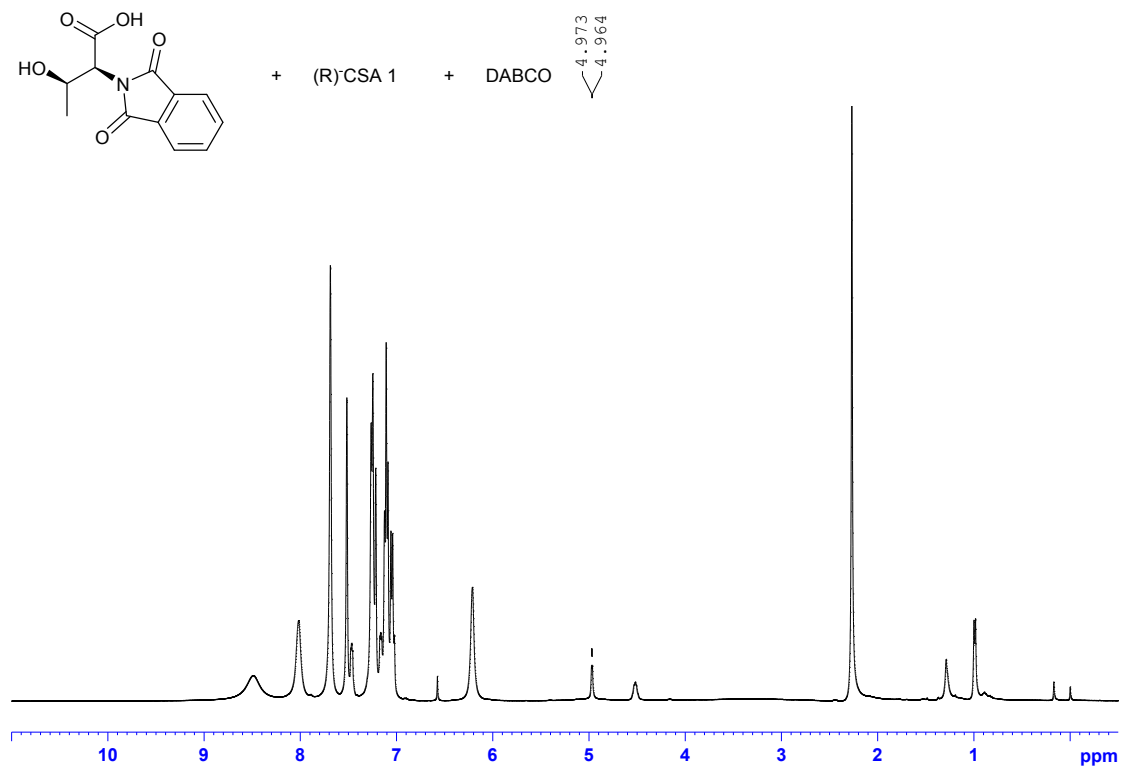

Figure S18.  $^1\text{H}$  NMR (400 MHz, TMS) of (*S*)-CSA 1, DABCO and N-Pht- $\alpha$ -amino acid 9

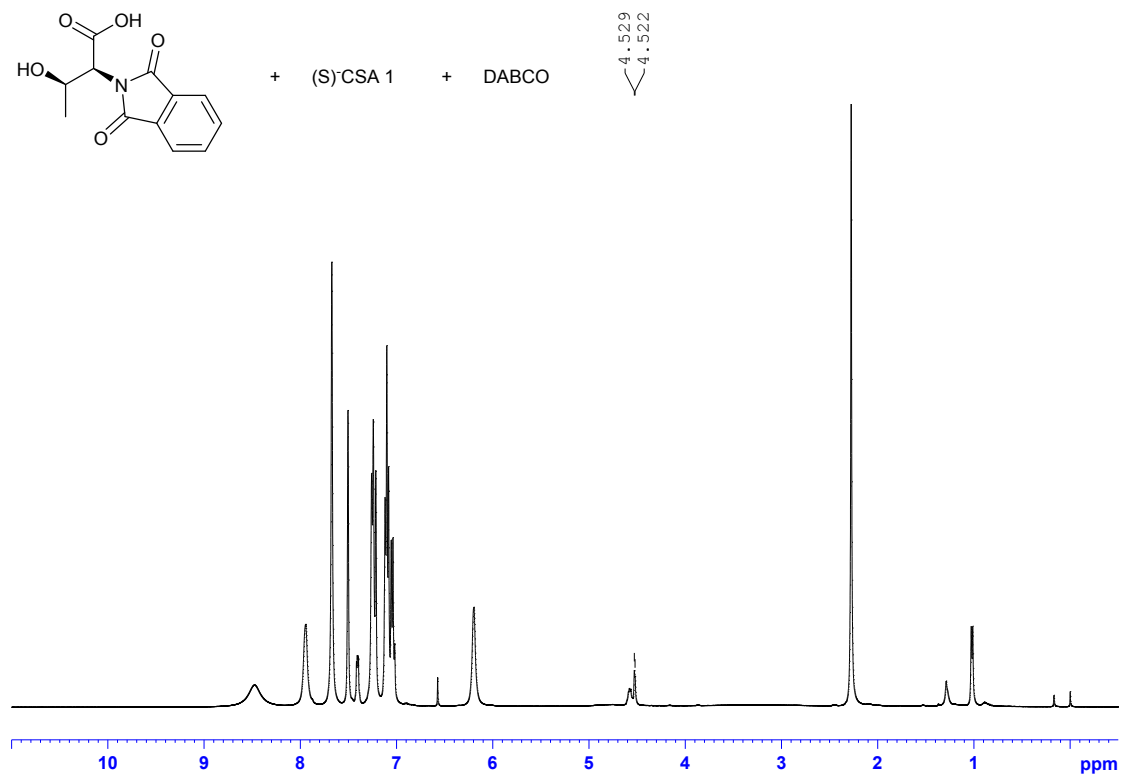

Figure S19. <sup>1</sup>H NMR (400 MHz, TMS) of (R)-CSA 1, DABCO and N-Pht- $\alpha$ -amino acid 10

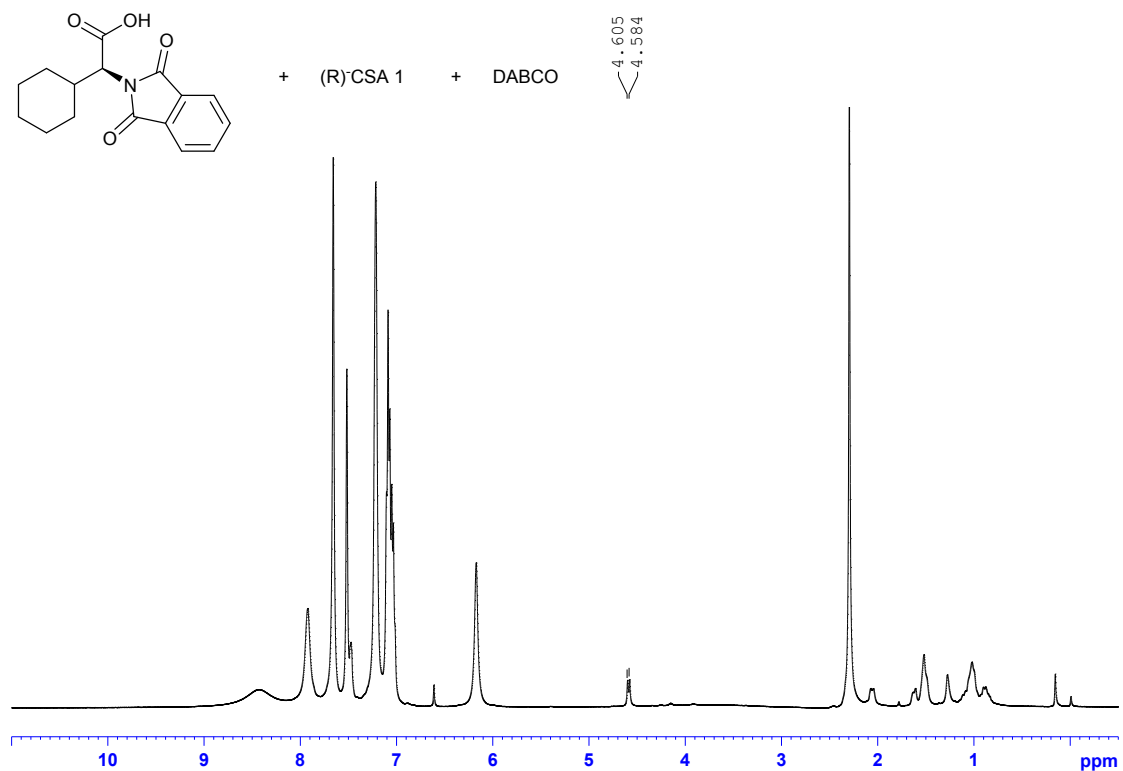

Figure S20. <sup>1</sup>H NMR (400 MHz, TMS) of (S)-CSA 1, DABCO and N-Pht- $\alpha$ -amino acid 10

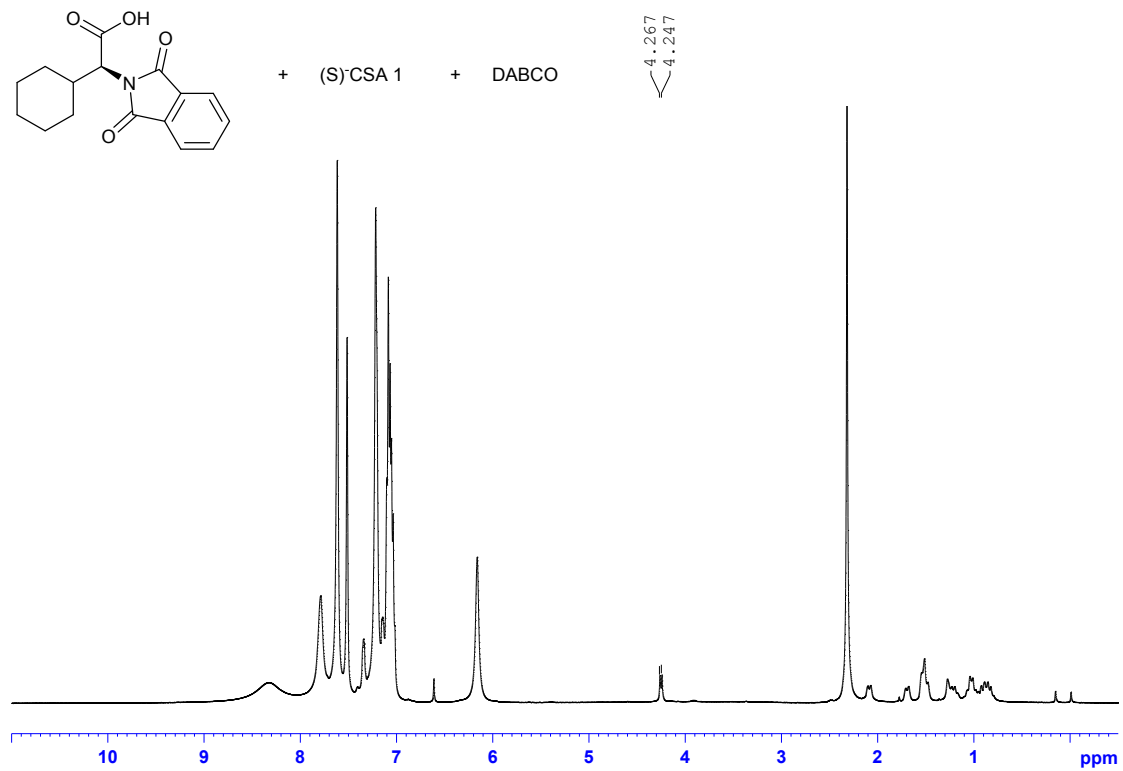

Figure S21. <sup>1</sup>H NMR (400 MHz, TMS) of (*R*)-CSA 1, DABCO and N-Pht- $\alpha$ -amino acid 11

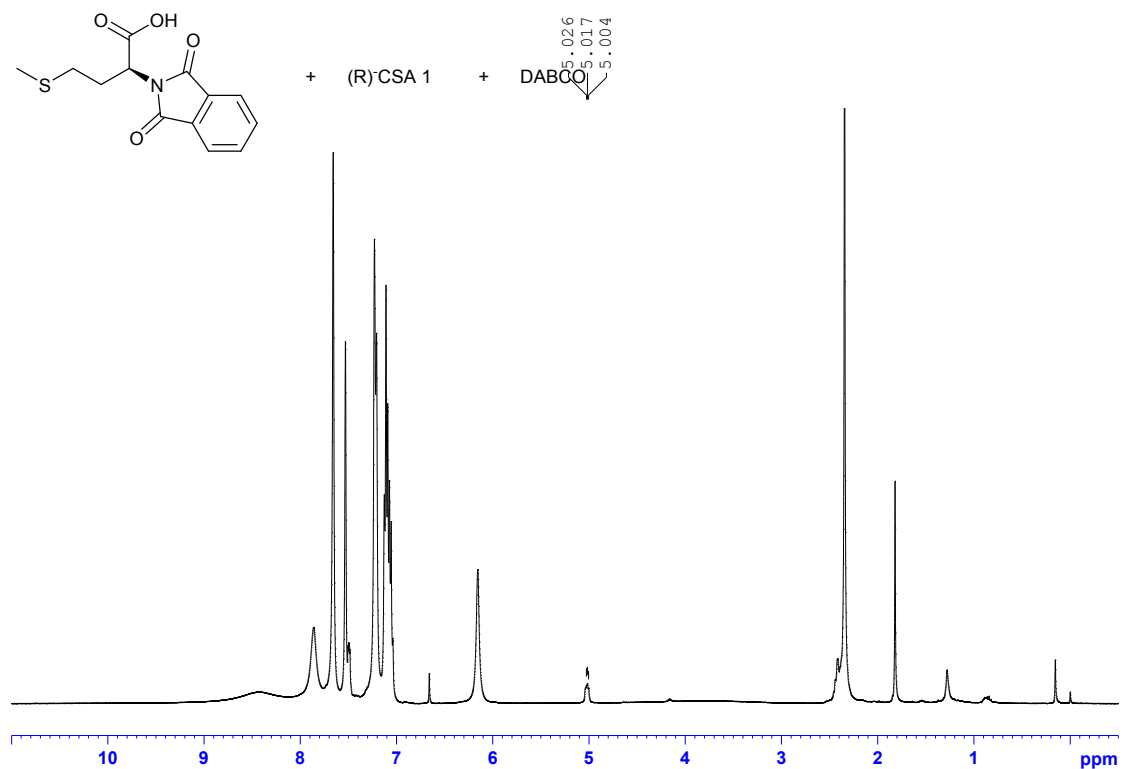

Figure S22. <sup>1</sup>H NMR (400 MHz, TMS) of (*S*)-CSA 1, DABCO and N-Pht- $\alpha$ -amino acid 11

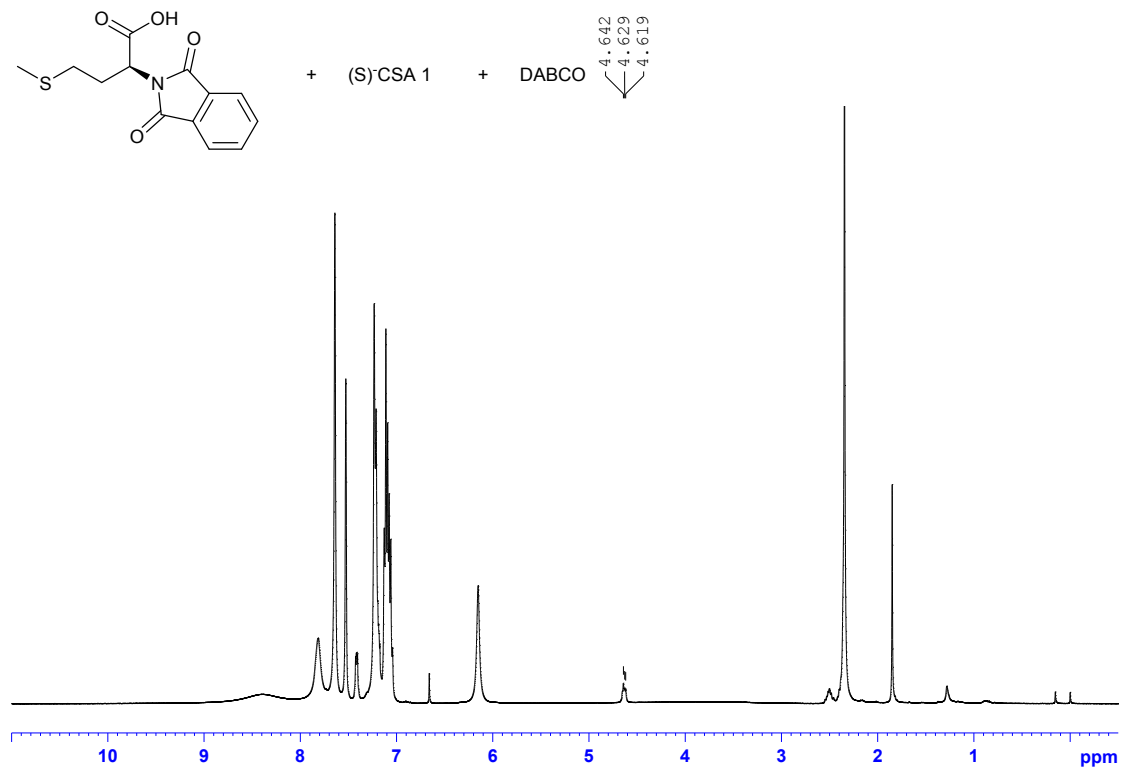

Figure S23. <sup>1</sup>H NMR (400 MHz, TMS) of (R)-CSA 1, DABCO and N-Pht- $\alpha$ -amino acid 12

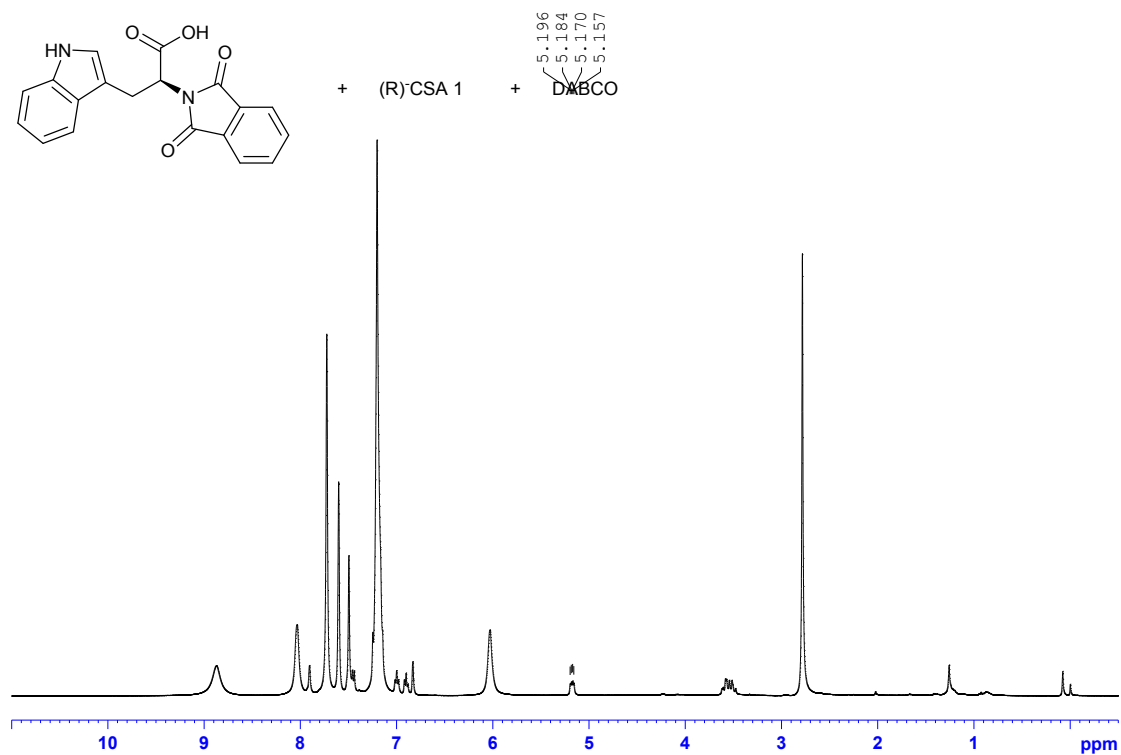

Figure S24. <sup>1</sup>H NMR (400 MHz, TMS) of (S)-CSA 1, DABCO and N-Pht- $\alpha$ -amino acid 12

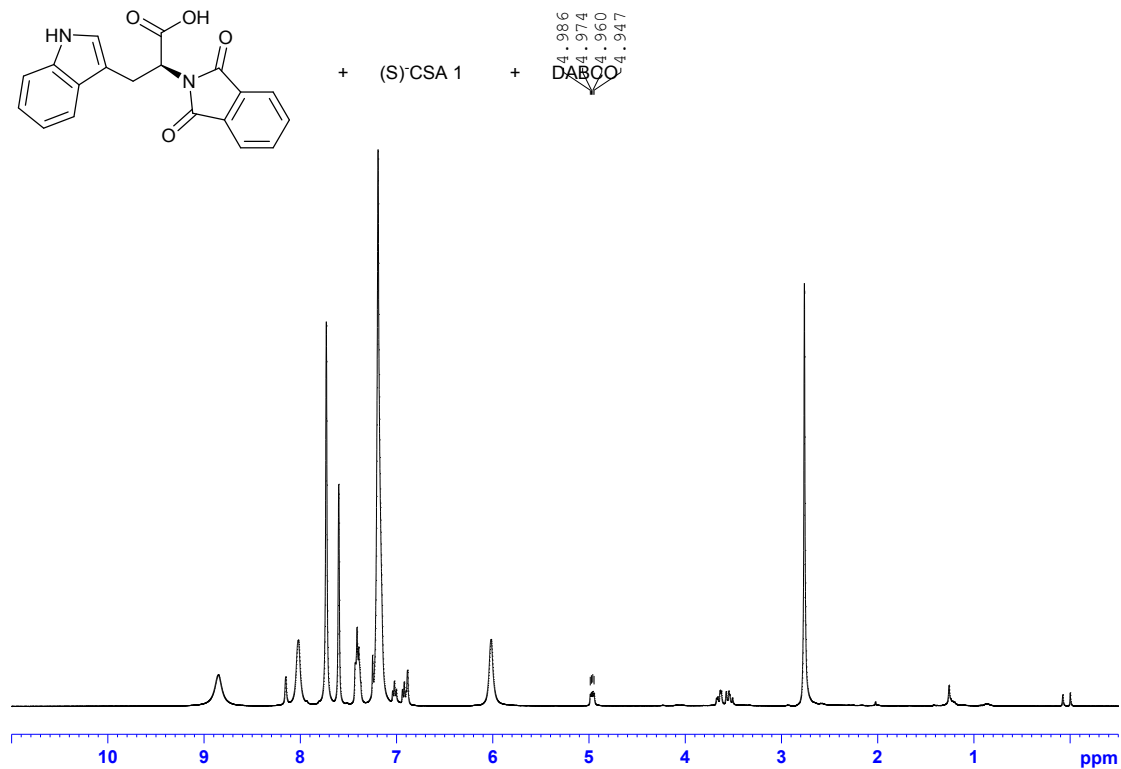

Figure S25. <sup>1</sup>H NMR (400 MHz, TMS) of (R)-CSA 1, DABCO and N-Pht- $\alpha$ -amino acid 13

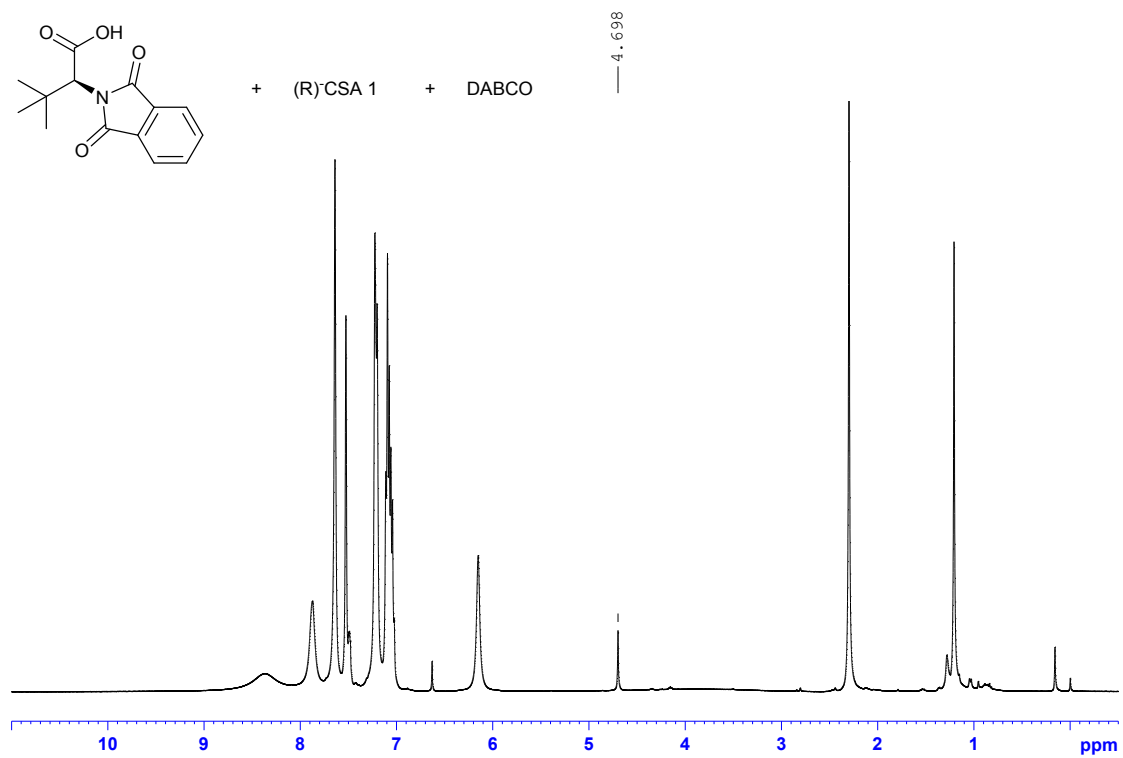

Figure S26. <sup>1</sup>H NMR (400 MHz, TMS) of (S)-CSA 1, DABCO and N-Pht- $\alpha$ -amino acid 13

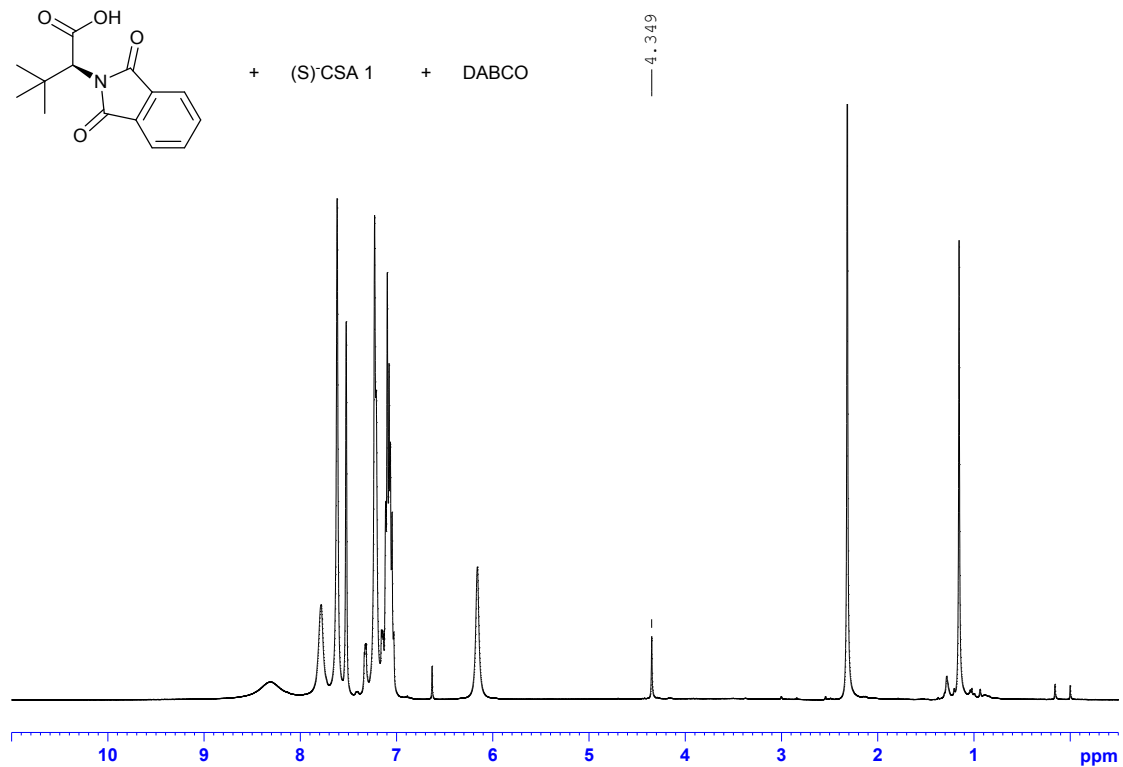

Figure S27. <sup>1</sup>H NMR (400 MHz, TMS) of (R)-CSA 1, DABCO and N-Pht- $\alpha$ -amino acid 14

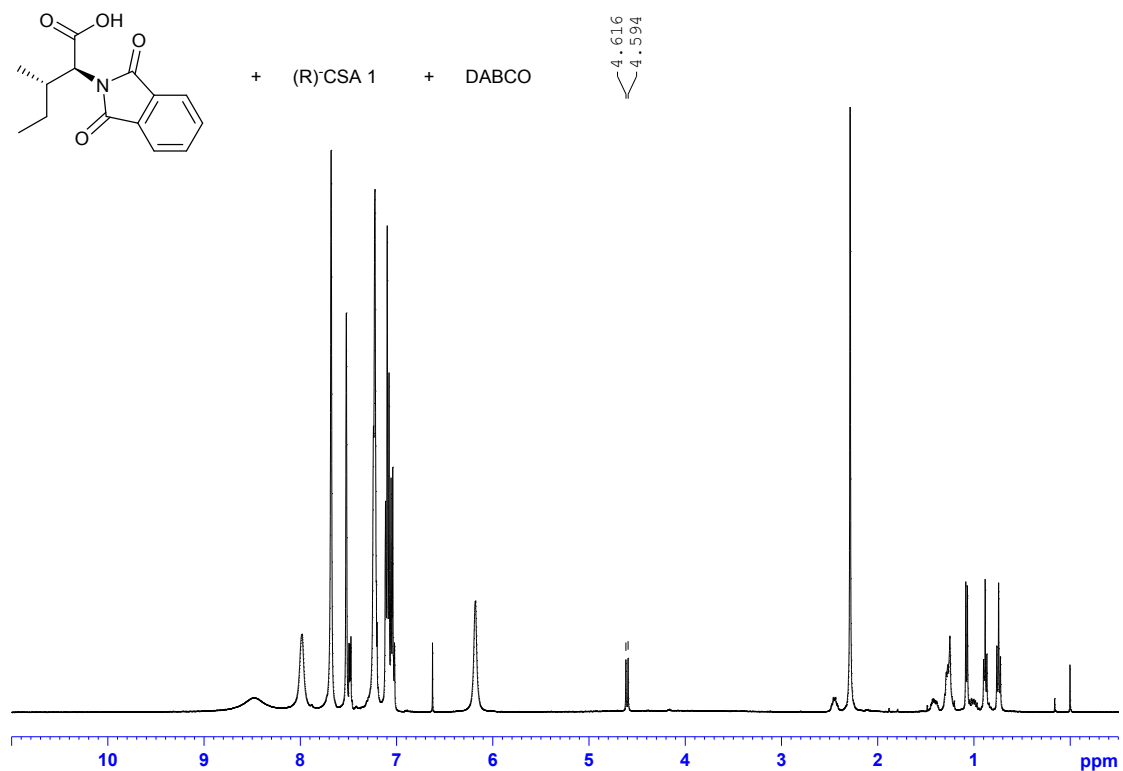

Figure S28. <sup>1</sup>H NMR (400 MHz, TMS) of (S)-CSA 1, DABCO and N-Pht- $\alpha$ -amino acid 14

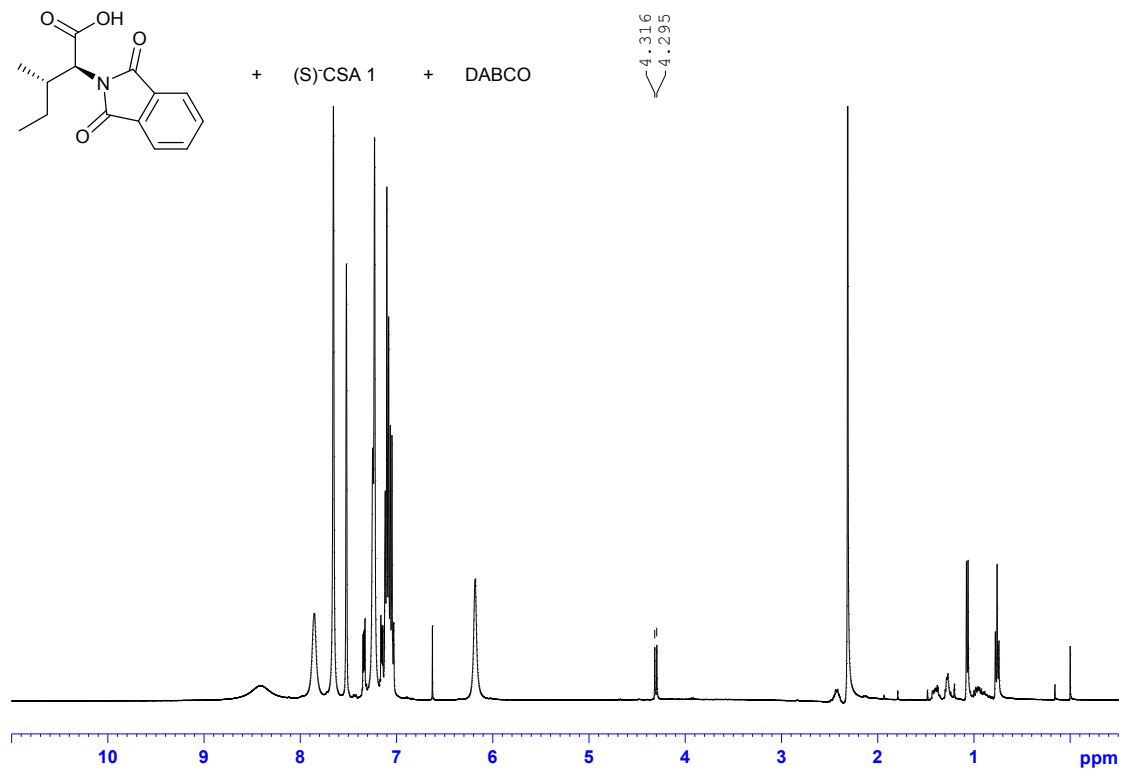



Figure S29. <sup>1</sup>H NMR (400 MHz, TMS) of (R)-CSA 1, DABCO and N-Pht- $\alpha$ -amino acid 15

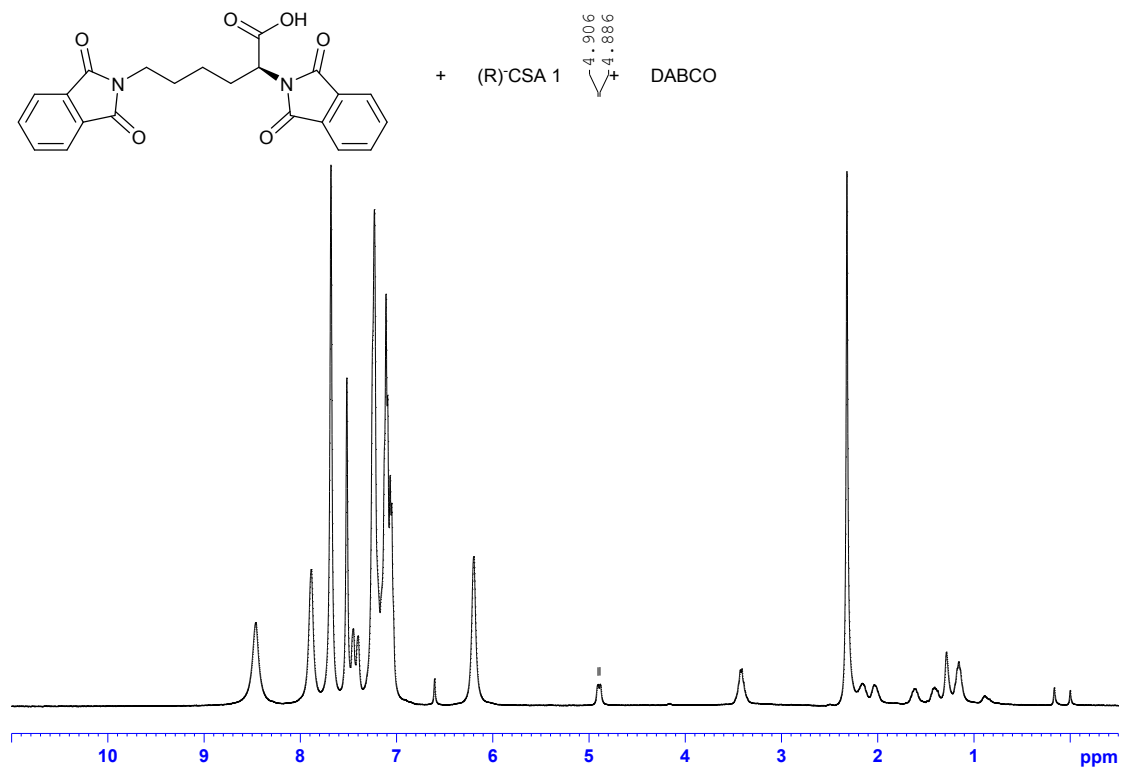

Figure S30. <sup>1</sup>H NMR (400 MHz, TMS) of (S)-CSA 1, DABCO and N-Pht- $\alpha$ -amino acid 15

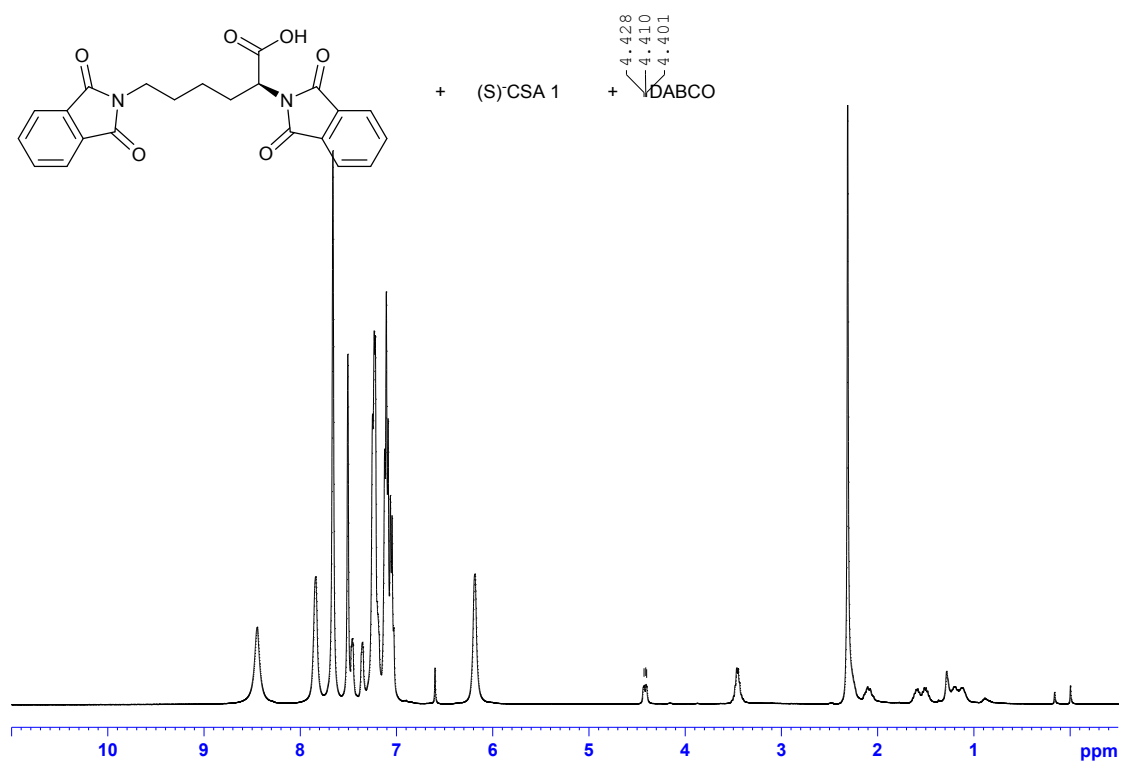

Figure S31. <sup>1</sup>H NMR (400 MHz, TMS) of (*R*)-CSA 1, DABCO and N-Pht- $\alpha$ -amino acid 16

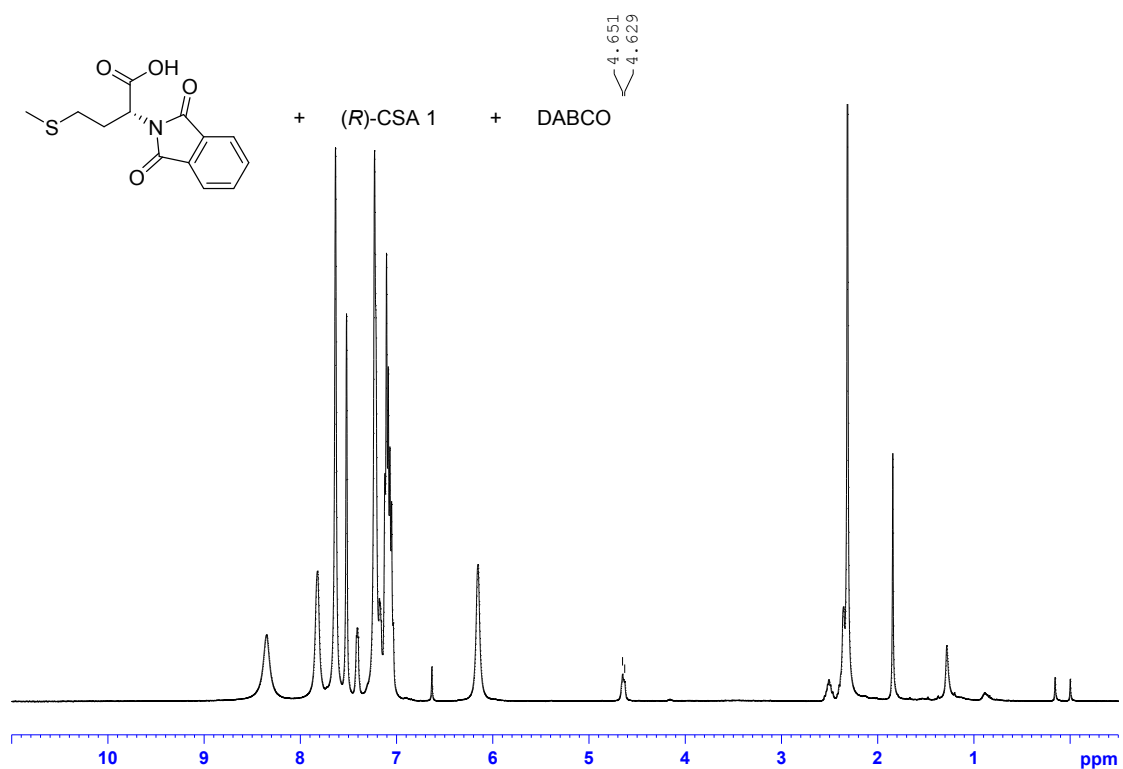

Figure S32. <sup>1</sup>H NMR (400 MHz, TMS) of (*S*)-CSA 1, DABCO and N-Pht- $\alpha$ -amino acid 16

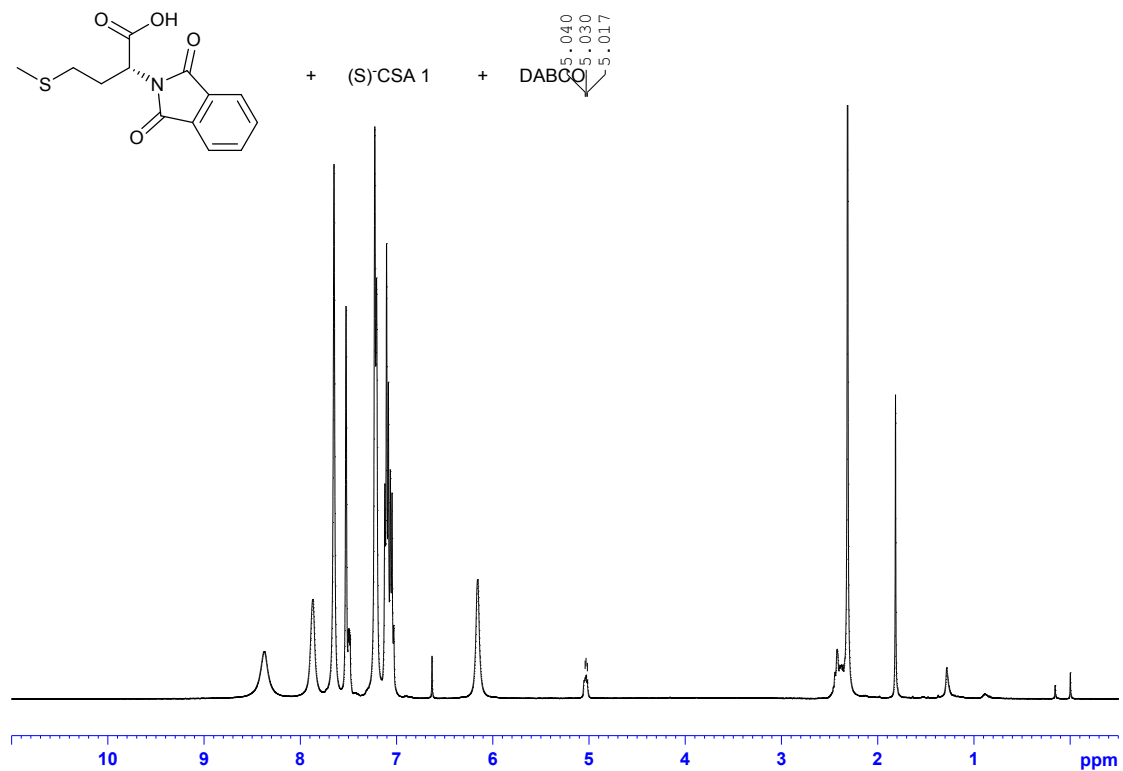

Figure S33. <sup>1</sup>H NMR (400 MHz, TMS) of (R)-CSA 1, DABCO and N-Pht- $\alpha$ -amino acid 17

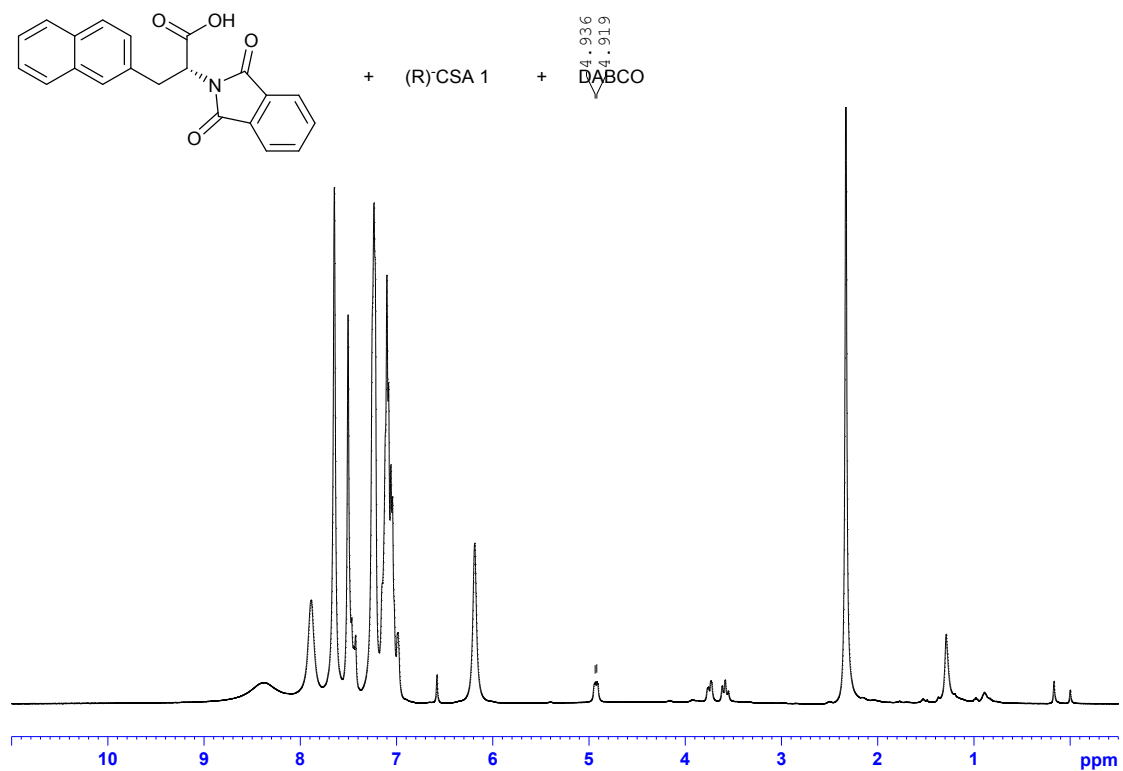

Figure S34. <sup>1</sup>H NMR (400 MHz, TMS) of (S)-CSA 1, DABCO and N-Pht- $\alpha$ -amino acid 17

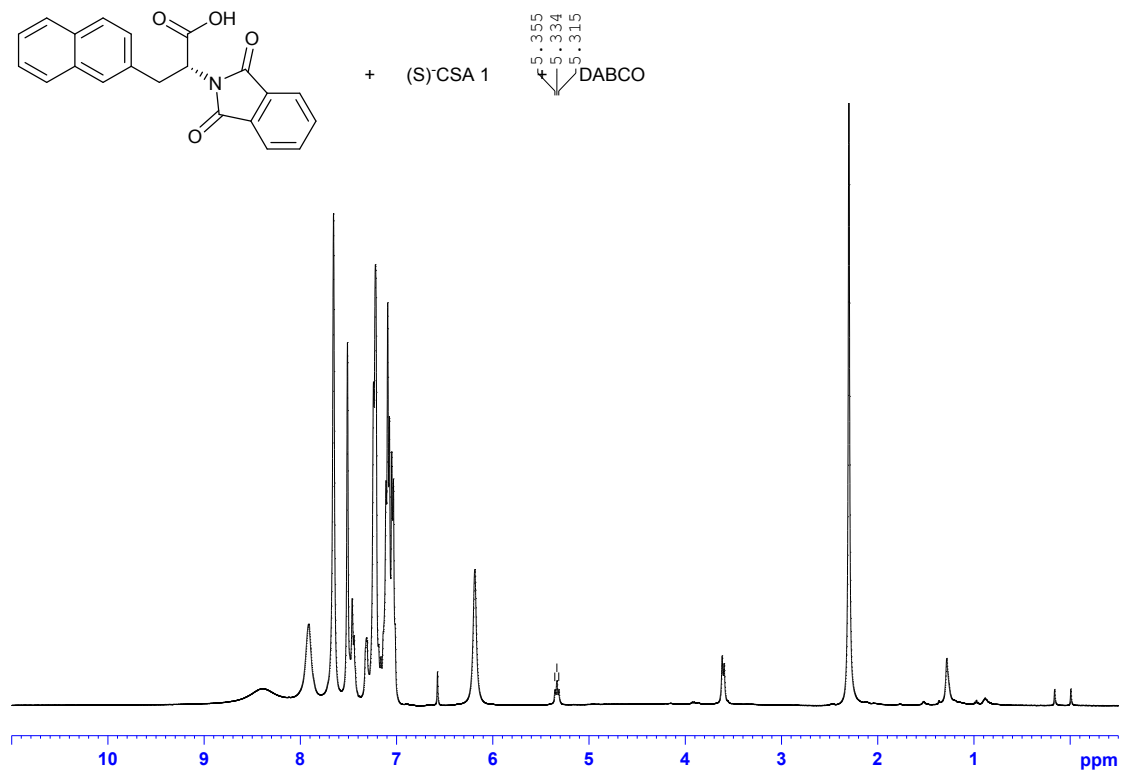

Figure S35. <sup>1</sup>H NMR (400 MHz, TMS) of (R)-CSA 1, DABCO and N-Pht- $\alpha$ -amino acid 18

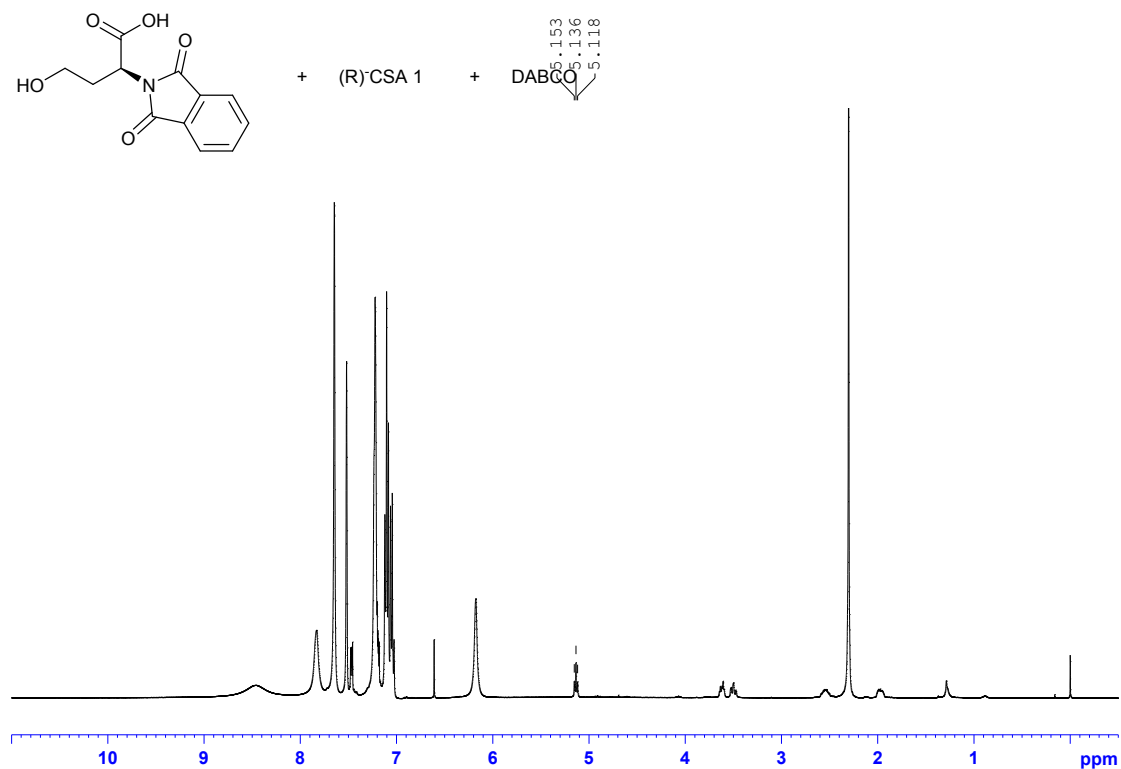

Figure S36. <sup>1</sup>H NMR (400 MHz, TMS) of (S)-CSA 1, DABCO and N-Pht- $\alpha$ -amino acid 18

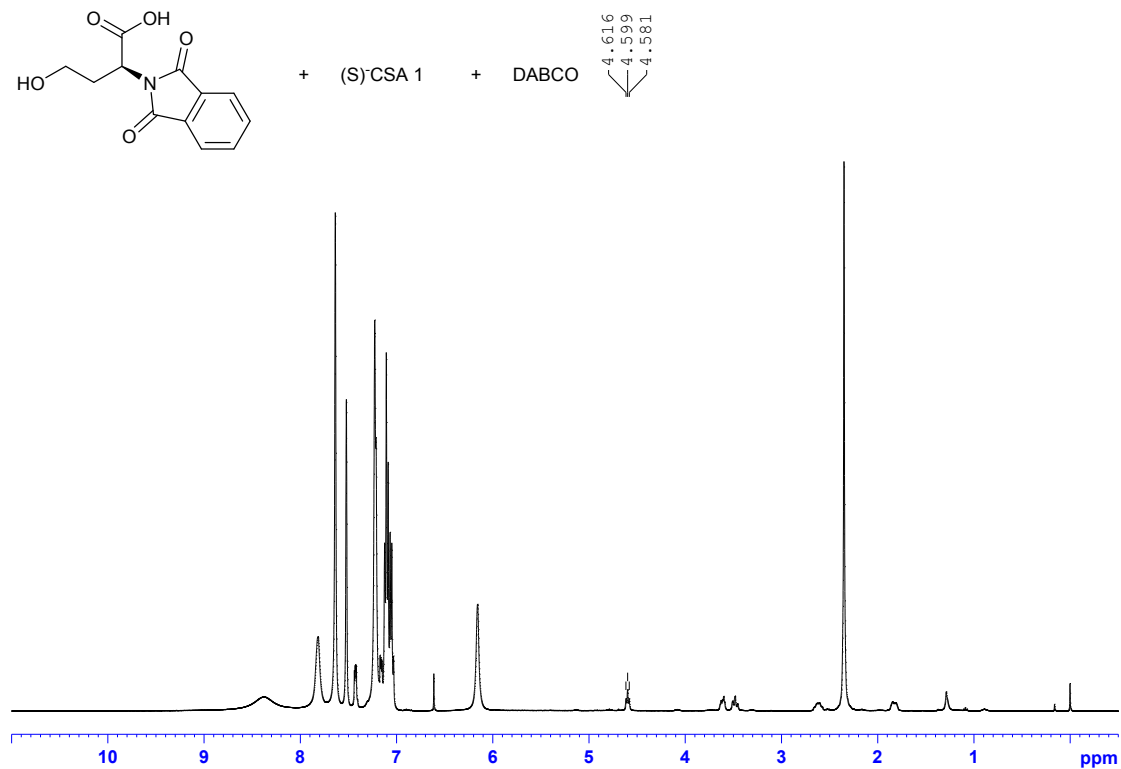

Figure S37. <sup>1</sup>H NMR (400 MHz, TMS) of (R)-CSA 1, DABCO and N-Pht- $\alpha$ -amino acid 19

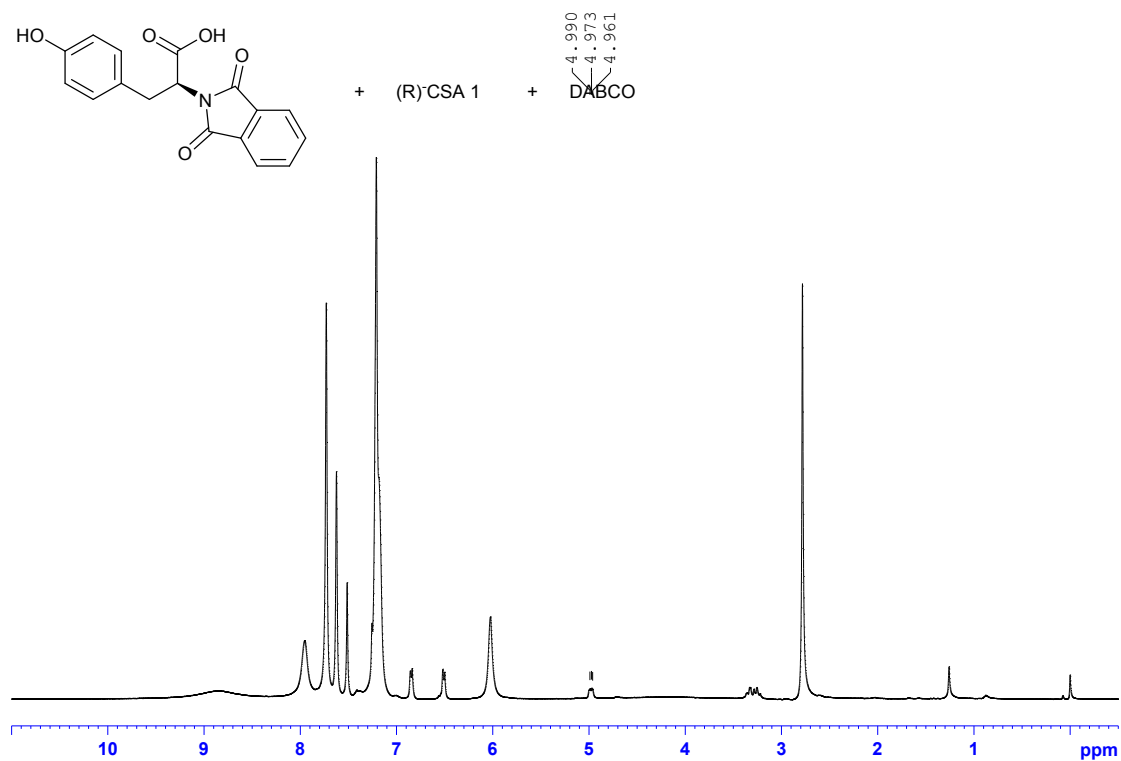

Figure S38. <sup>1</sup>H NMR (400 MHz, TMS) of (S)-CSA 1, DABCO and N-Pht- $\alpha$ -amino acid 19

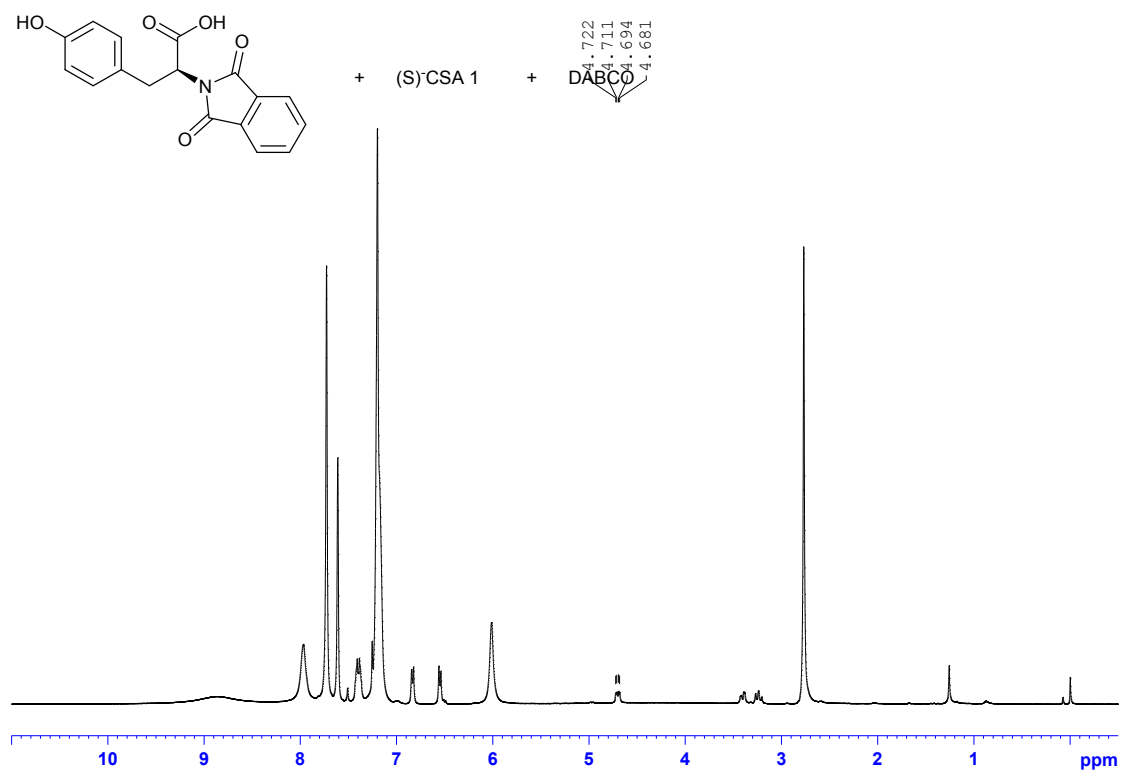

Figure S39. <sup>1</sup>H NMR (400 MHz, TMS) of (R)-CSA 1, DABCO and N-Pht- $\alpha$ -amino acid 20

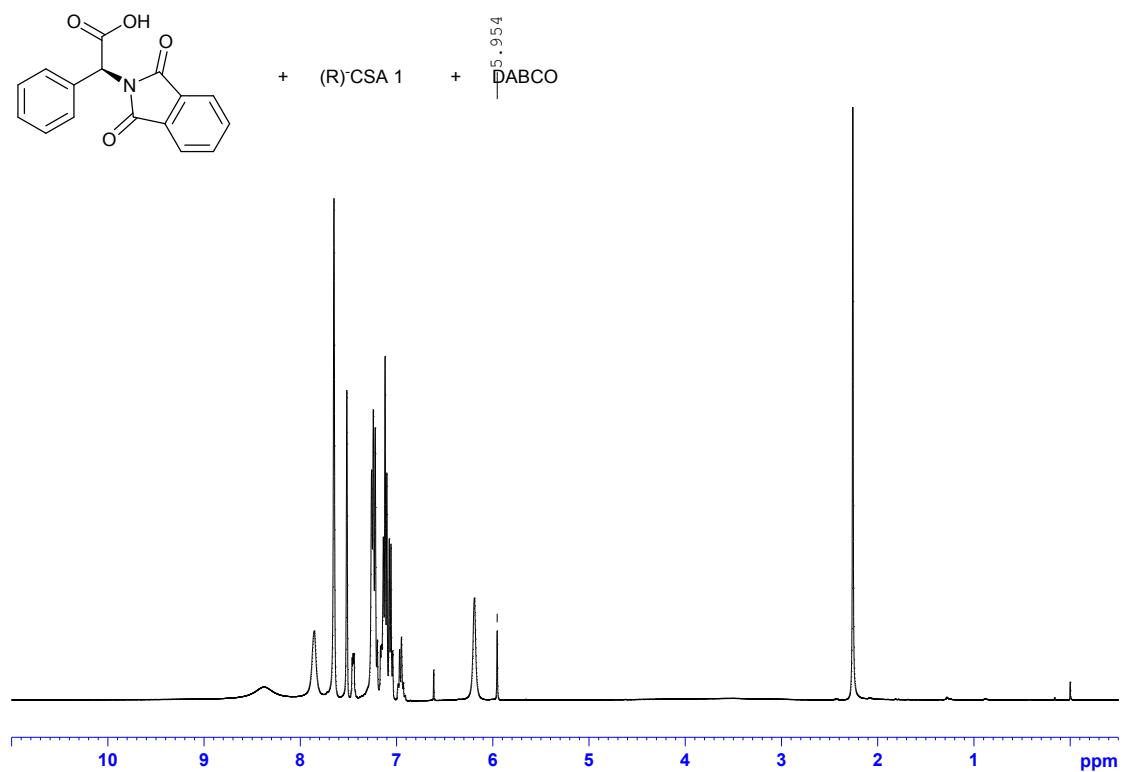

Figure S40.  $^1\text{H}$  NMR (400 MHz, TMS) of (S)-CSA 1, DABCO and N-Pht- $\alpha$ -amino acid 20

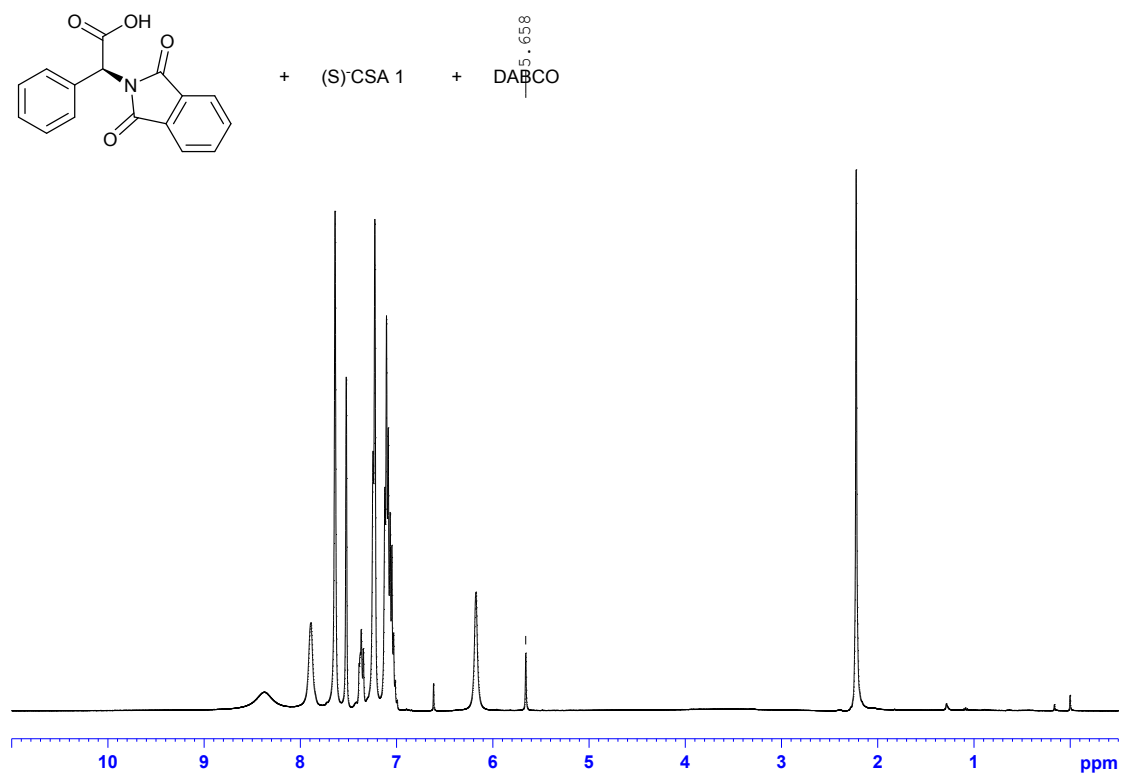

Figure S41.  $^1\text{H}$  NMR (400 MHz, TMS) of (R)-CSA 1, DABCO and N-Pht- $\alpha$ -amino acid 21

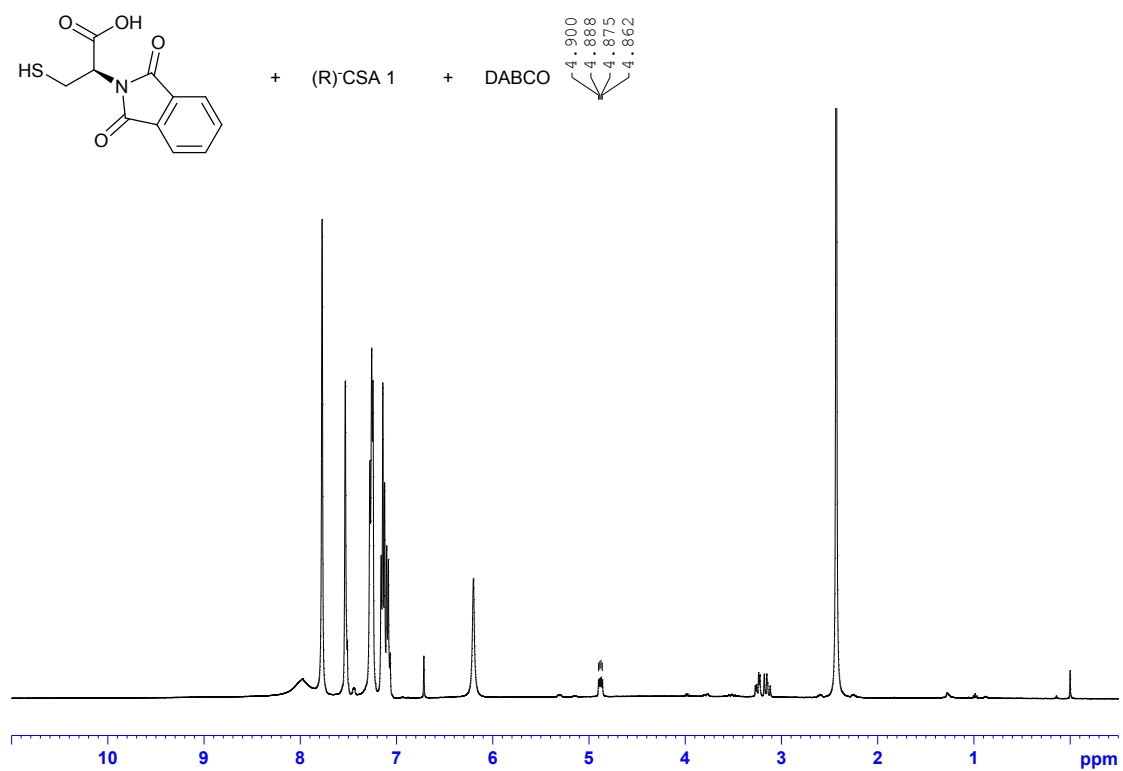

Figure S42.  $^1\text{H}$  NMR (400 MHz, TMS) of (*S*)-CSA 1, DABCO and N-Pht- $\alpha$ -amino acid 21

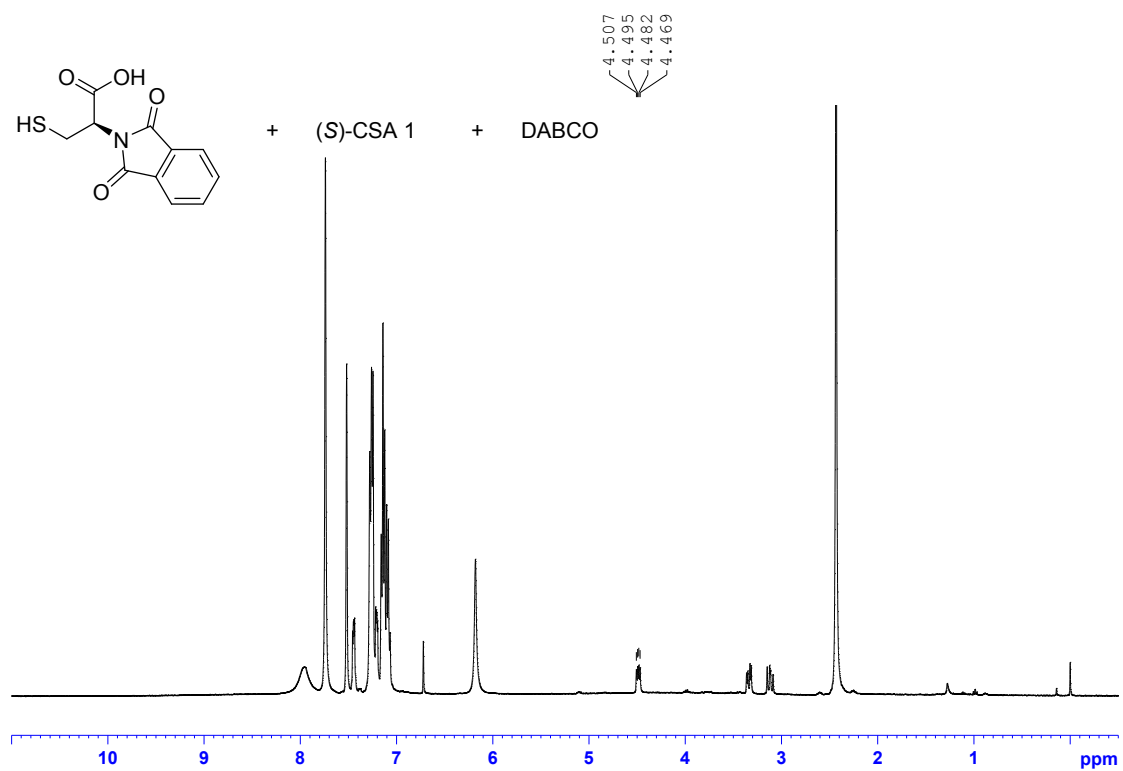

Figure S43.  $^1\text{H}$  NMR (400 MHz, TMS) of (*R*)-CSA 1, DABCO and N-Pht- $\alpha$ -amino acid 22

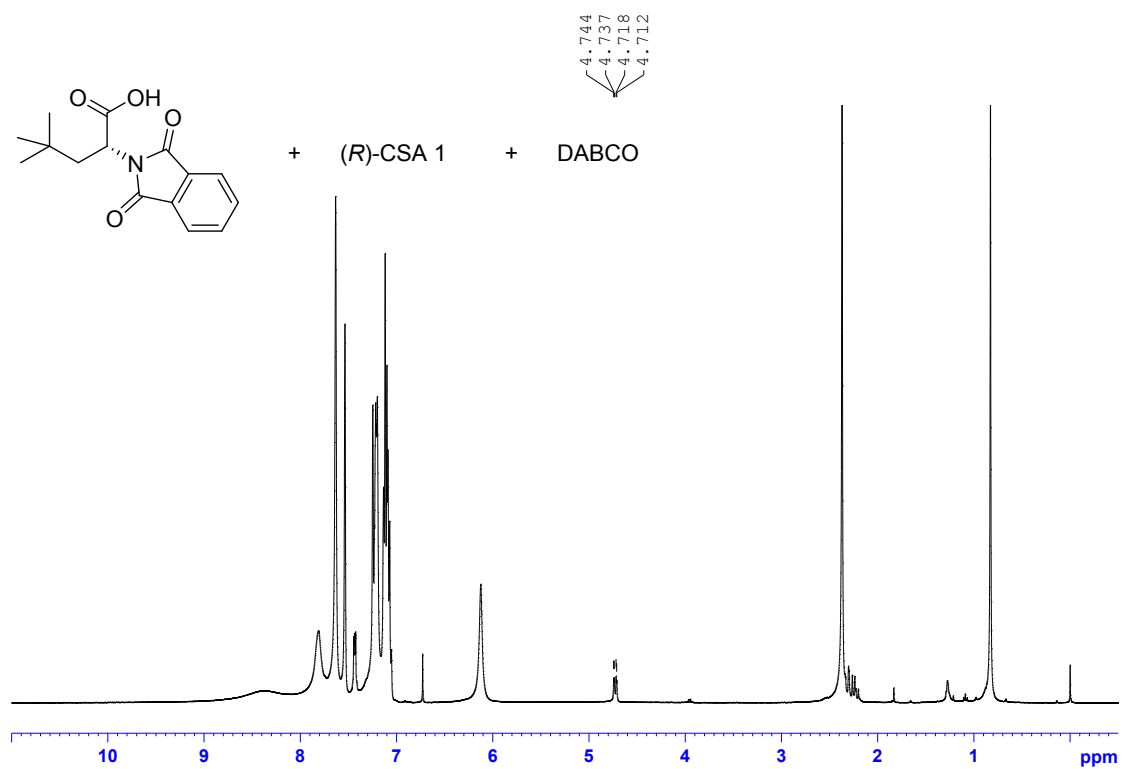

Figure S44.  $^1\text{H}$  NMR (400 MHz, TMS) of (S)-CSA 1, DABCO and N-Pht- $\alpha$ -amino acid 22

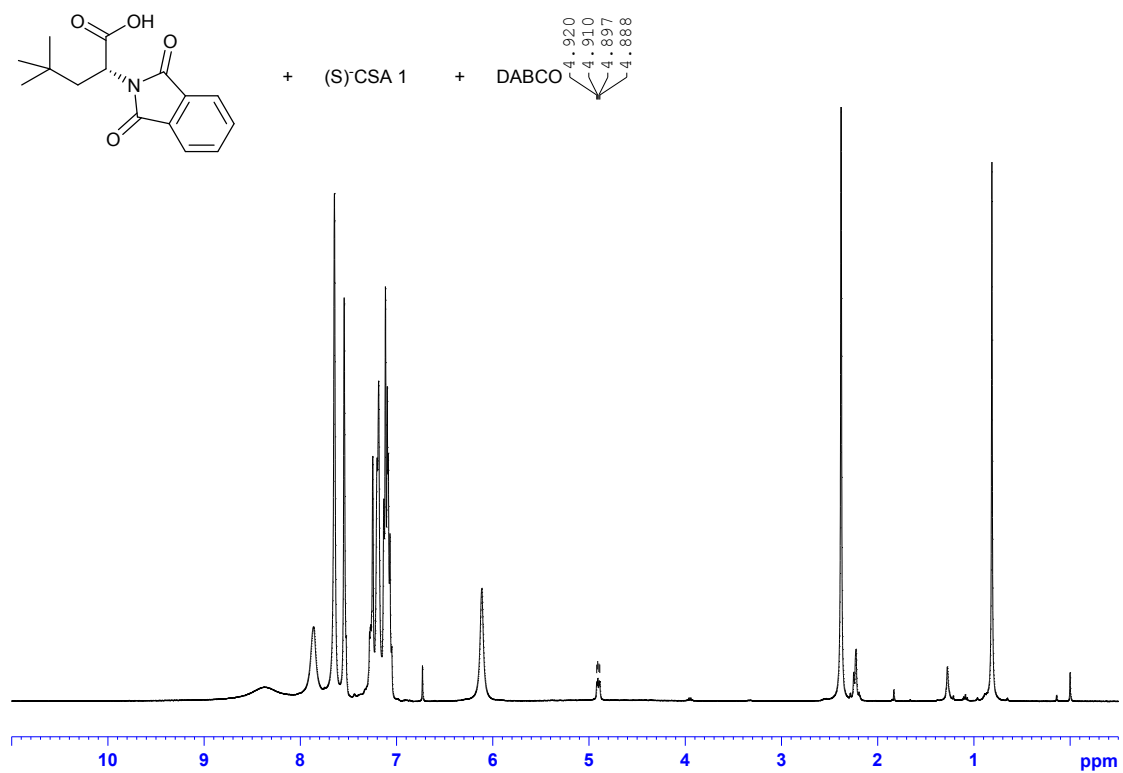

Figure S45.  $^1\text{H}$  NMR (400 MHz, TMS) of (R)-CSA 1, DABCO and N-Pht- $\alpha$ -amino acid 23



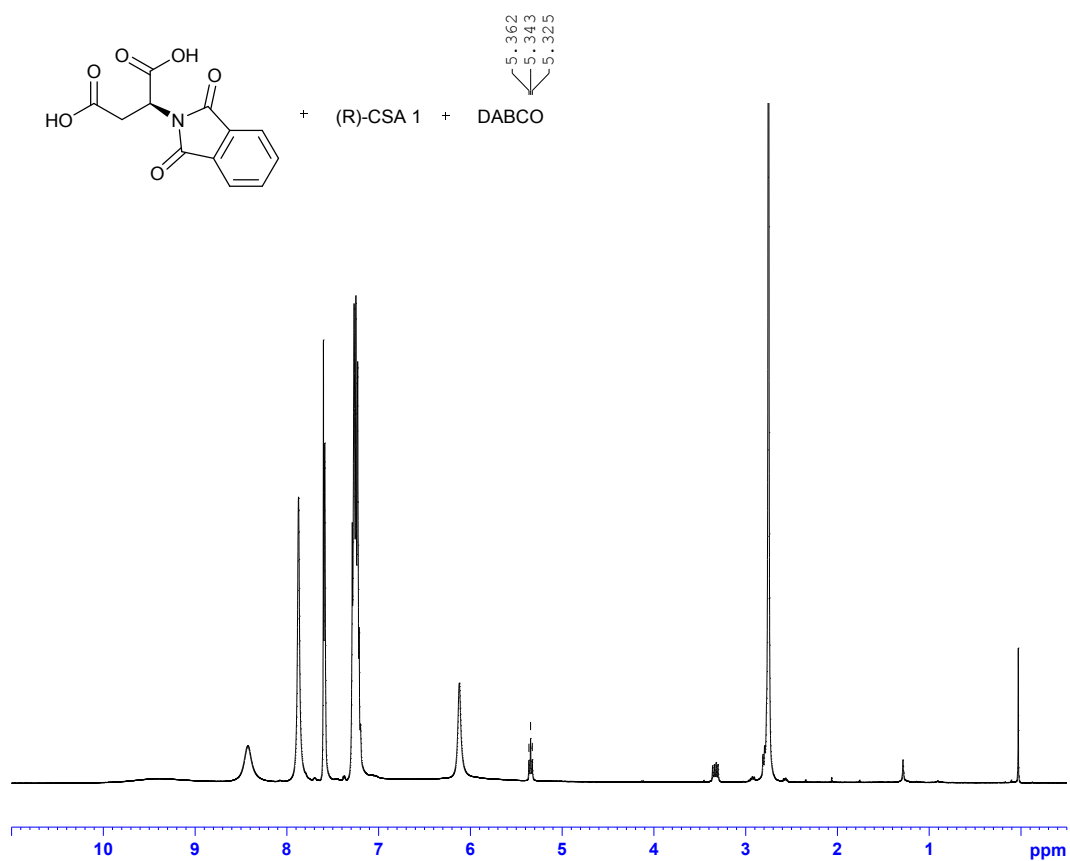

Figure S46.  $^1\text{H NMR}$  (400 MHz, TMS) of (S)-CSA 1, DABCO and N-Pht- $\alpha$ -amino acid 23

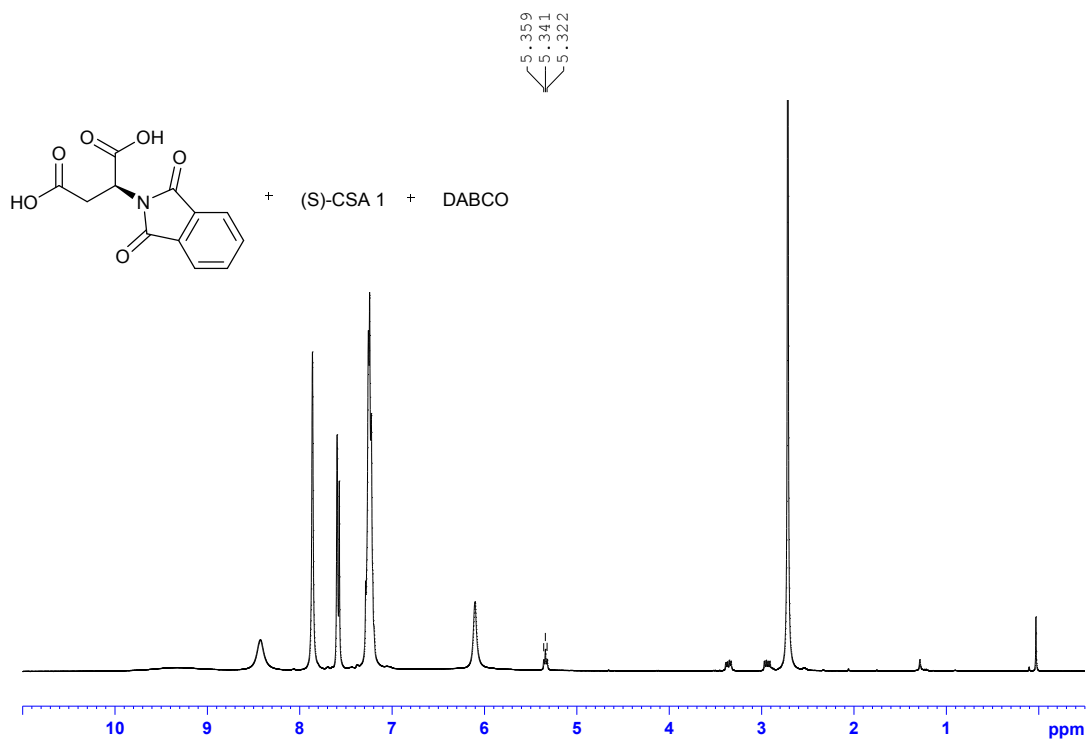

Figure S47.  $^1\text{H NMR}$  (400 MHz,  $\text{CDCl}_3$ , TMS) N-Pht- $\alpha$ -amino acid 10

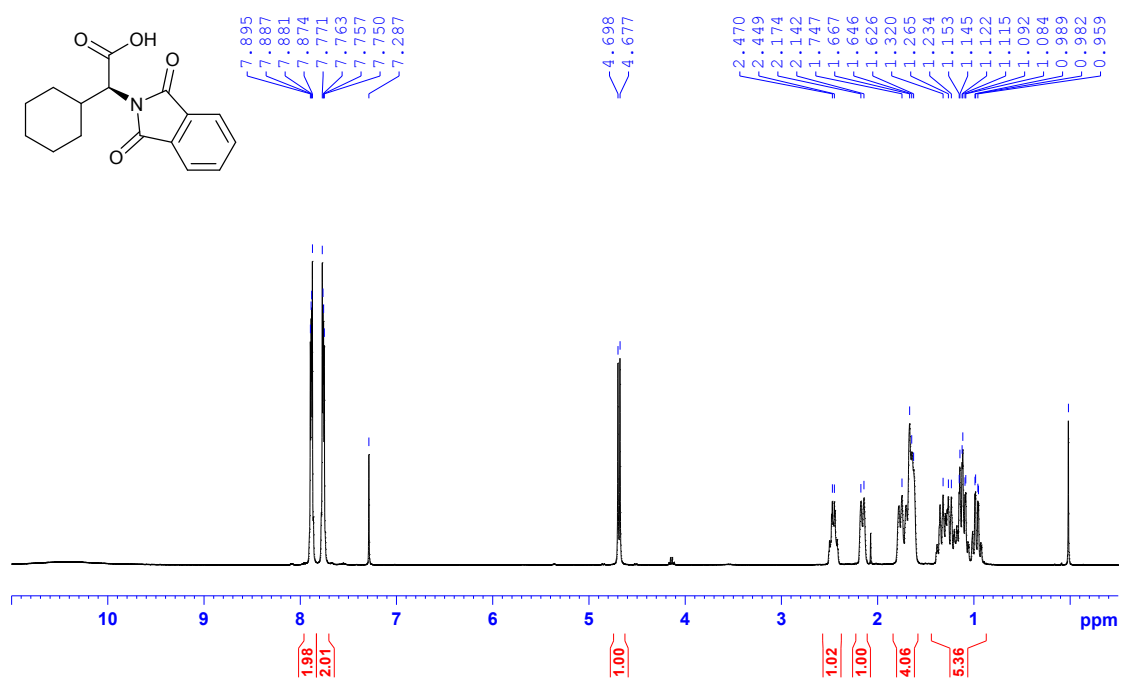

Figure S48.  $^{13}\text{C}$  NMR (100 MHz,  $\text{CDCl}_3$ , TMS) N-Pht- $\alpha$ -amino acid 10

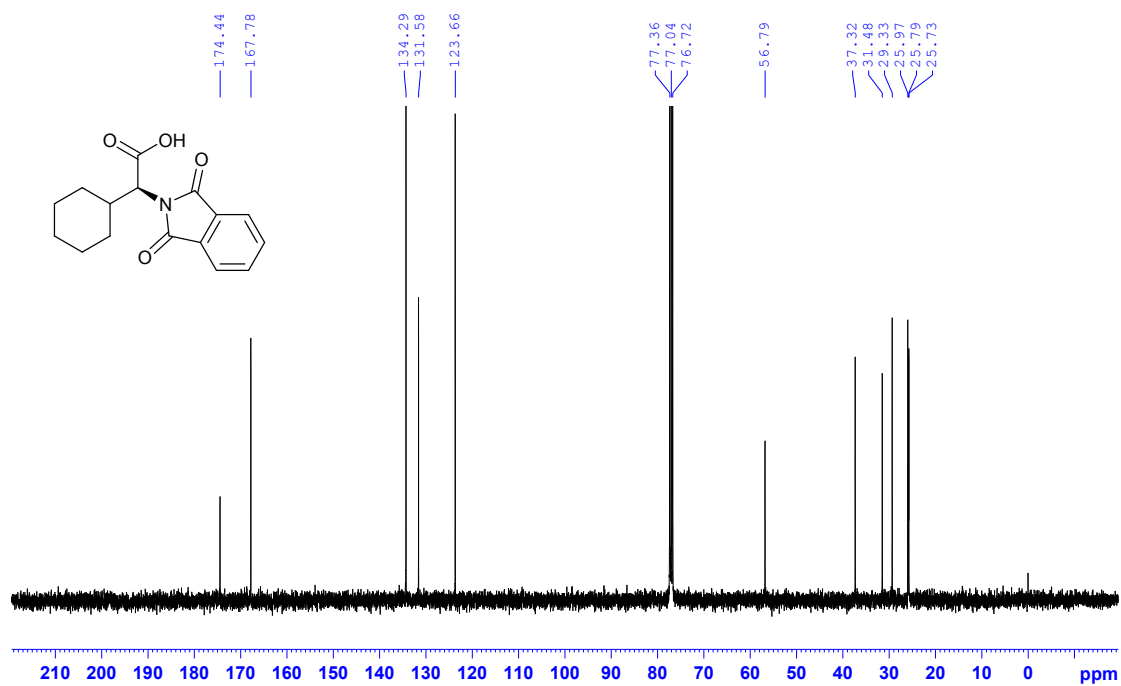

Figure S49.  $^{13}\text{C}$  NMR (400 MHz,  $\text{CDCl}_3$ , TMS) N-Pht- $\alpha$ -amino acid 22

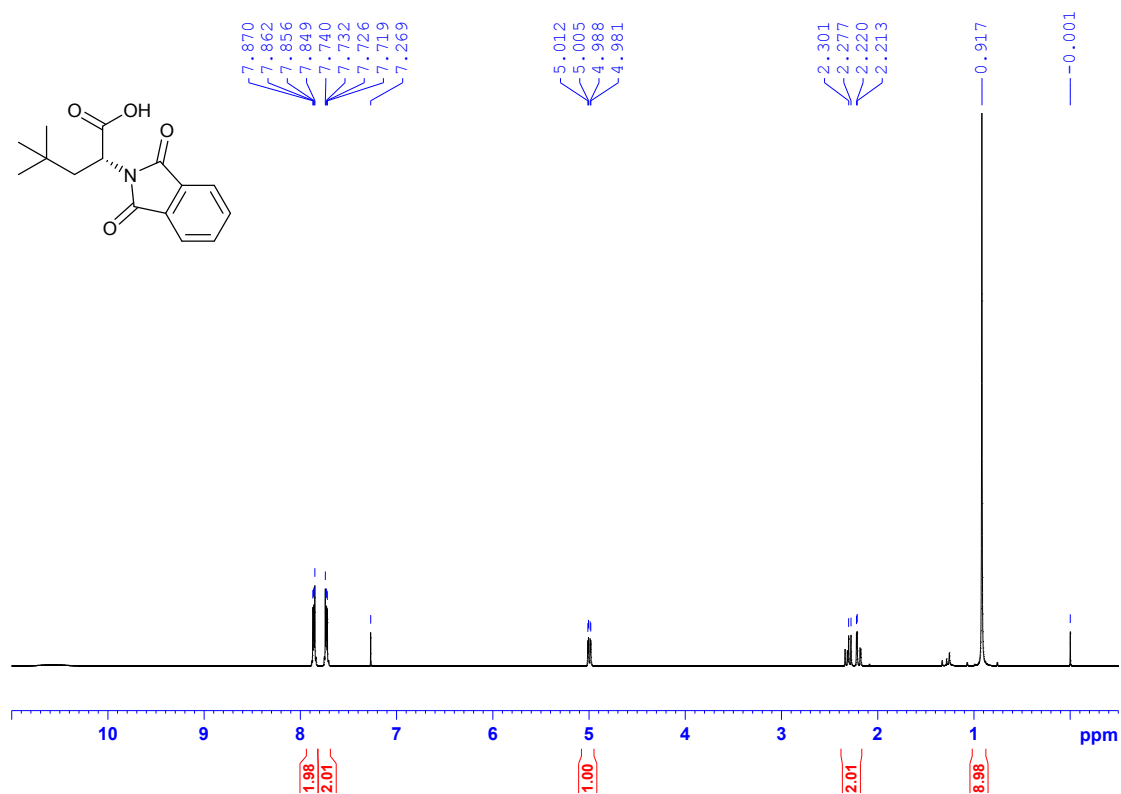

Figure S50.  $^{13}\text{C}$  NMR (100 MHz,  $\text{CDCl}_3$ , TMS) N-Pht- $\alpha$ -amino acid 22

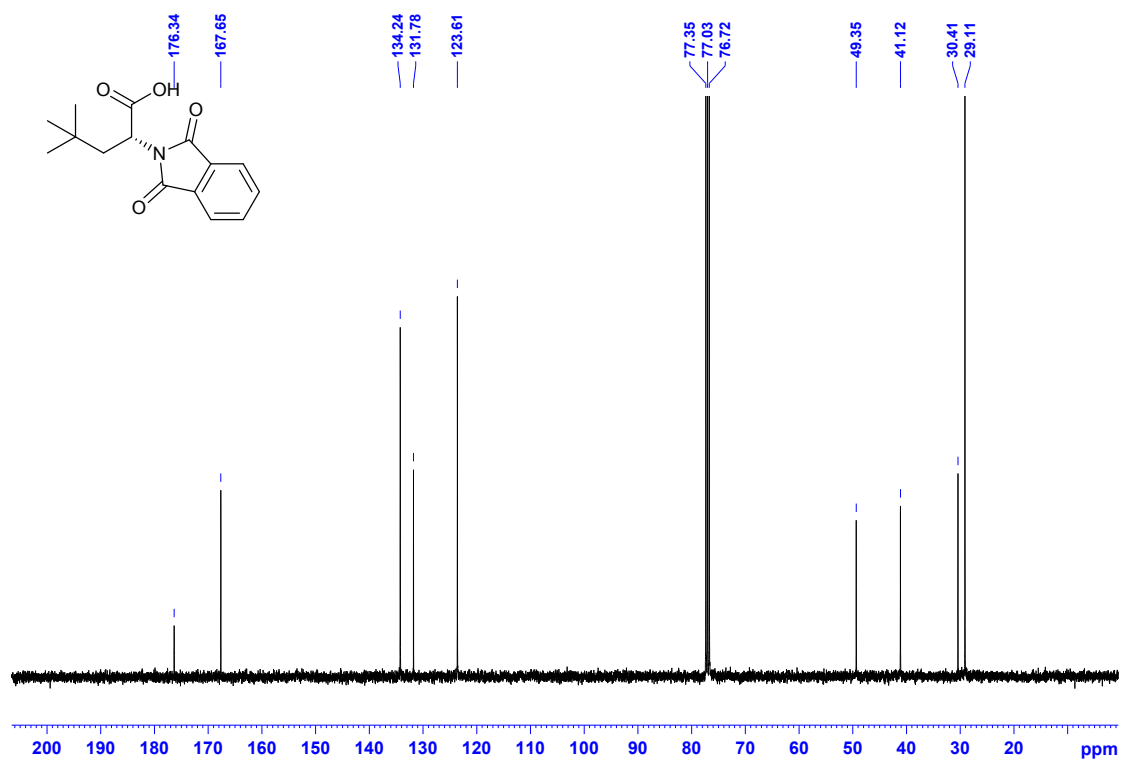

Figure S51.  $^1\text{H}$  NMR (500 MHz, TMS) of 50 mM (R)-CSA 1/50 mM L-Pht-Ala /50 mM DABCO

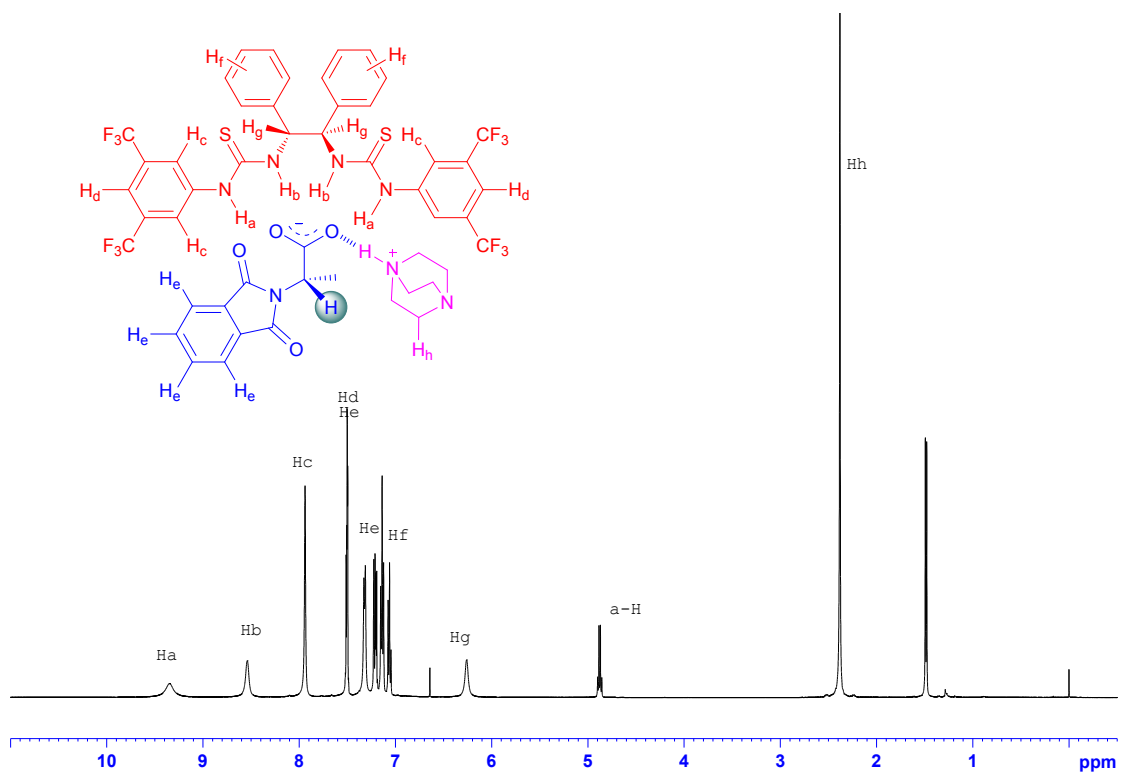

Figure S52. 1D NOESY (500 MHz, TMS) of 50 mM (*R*)-CSA 1/50 mM L-Pht-Ala /50 mM DABCO

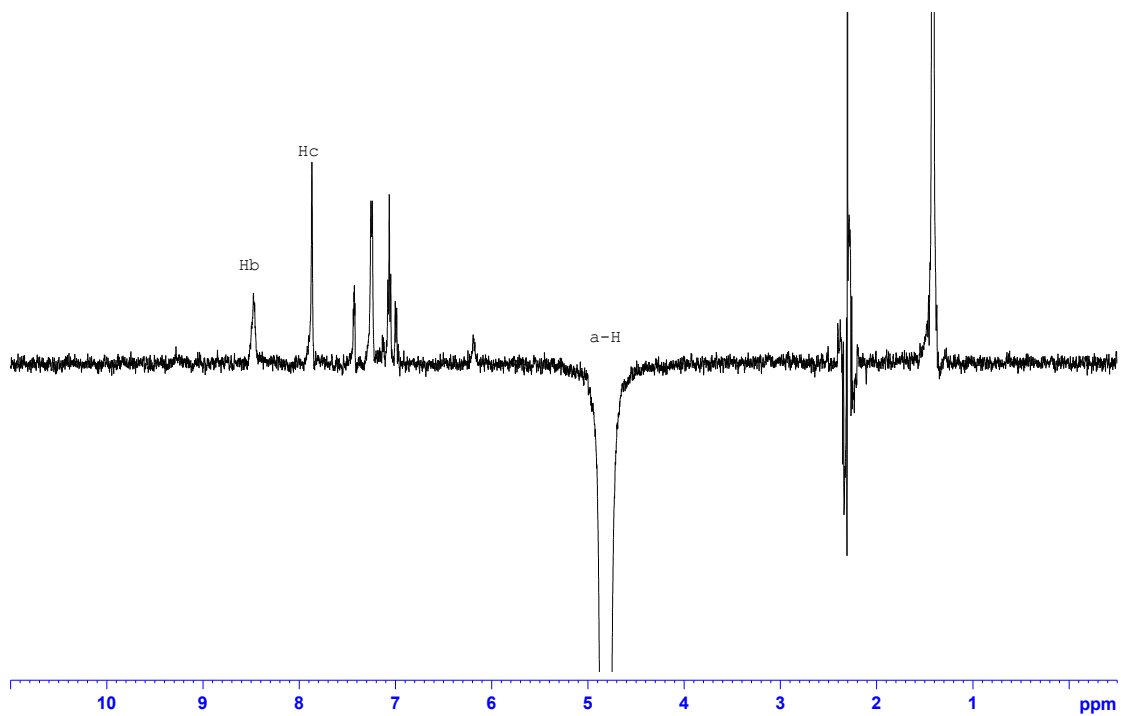

Figure S53. <sup>1</sup>H NMR (500 MHz, TMS) of 50 mM (*S*)-CSA 1/50 mM L-Pht-Ala/50 mM DABCO

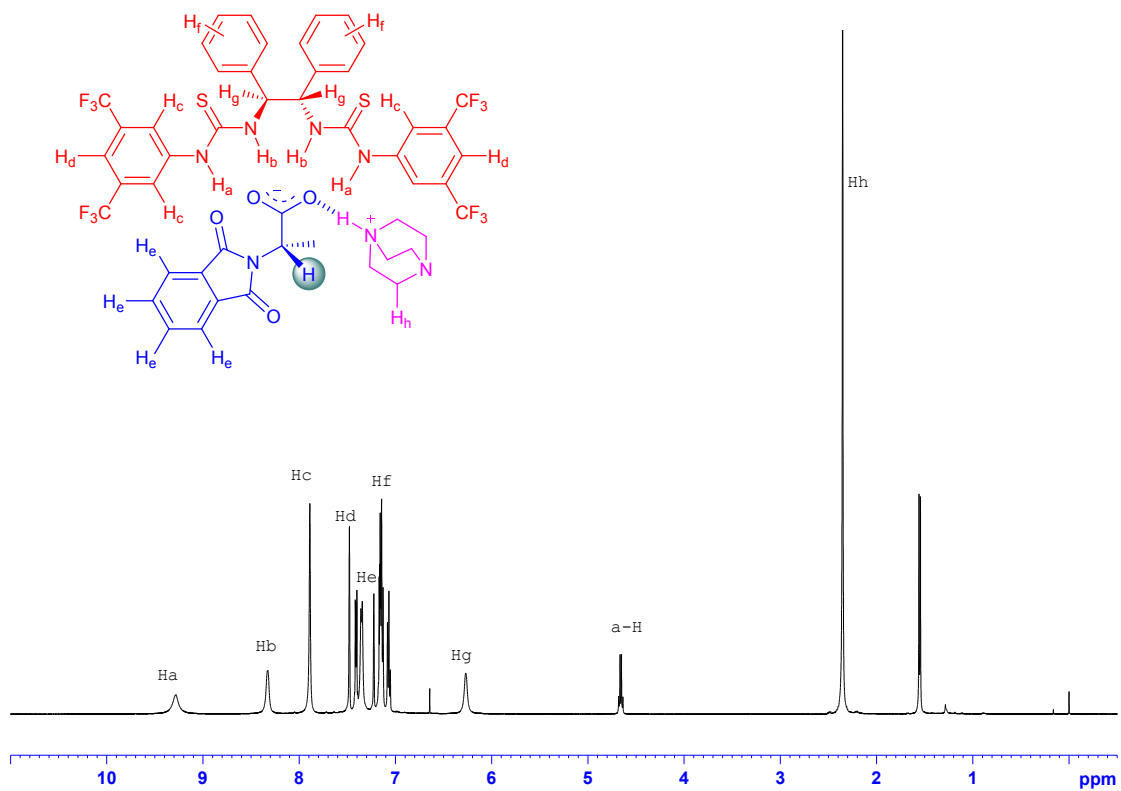

Figure S54. 1D NOESY (500 MHz, TMS) of 50 mM (*S*)-CSA 1/50 mM L-Pht-Ala /50 mM DABCO

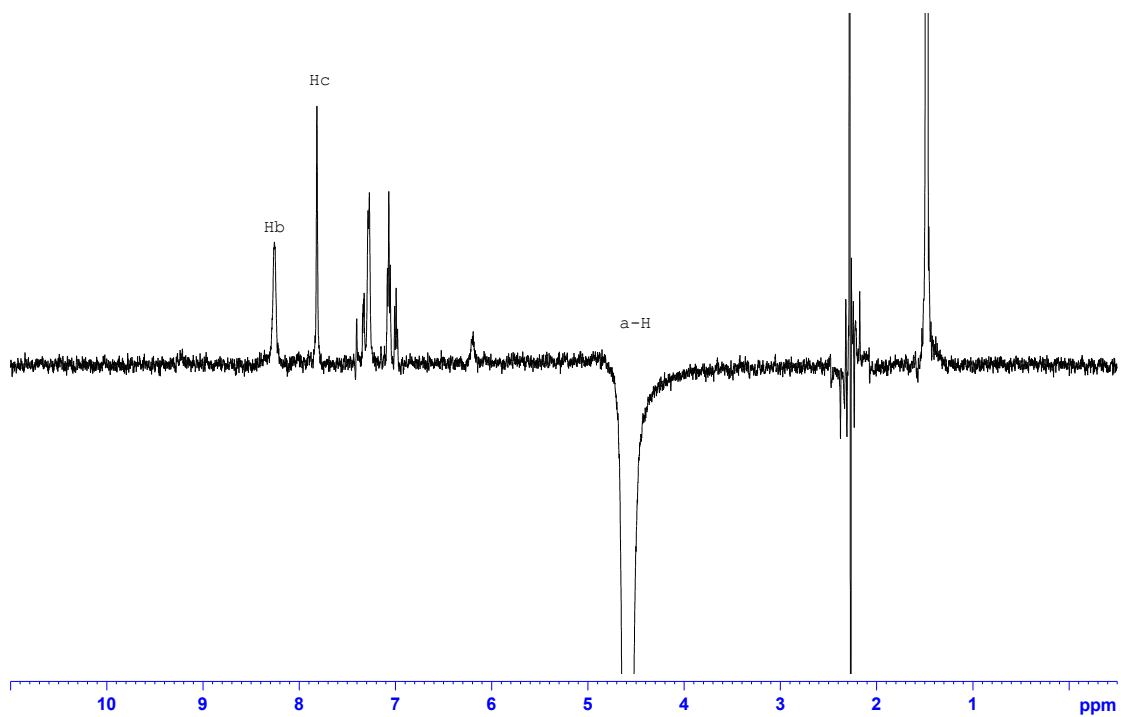

Figure S55. Contrasted 1D NOESY spectra

(*S*)-CSA 1/L-Pht-Ala/DABCO  
 (*R*)-CSA 1/L-Pht-Ala/DABCO

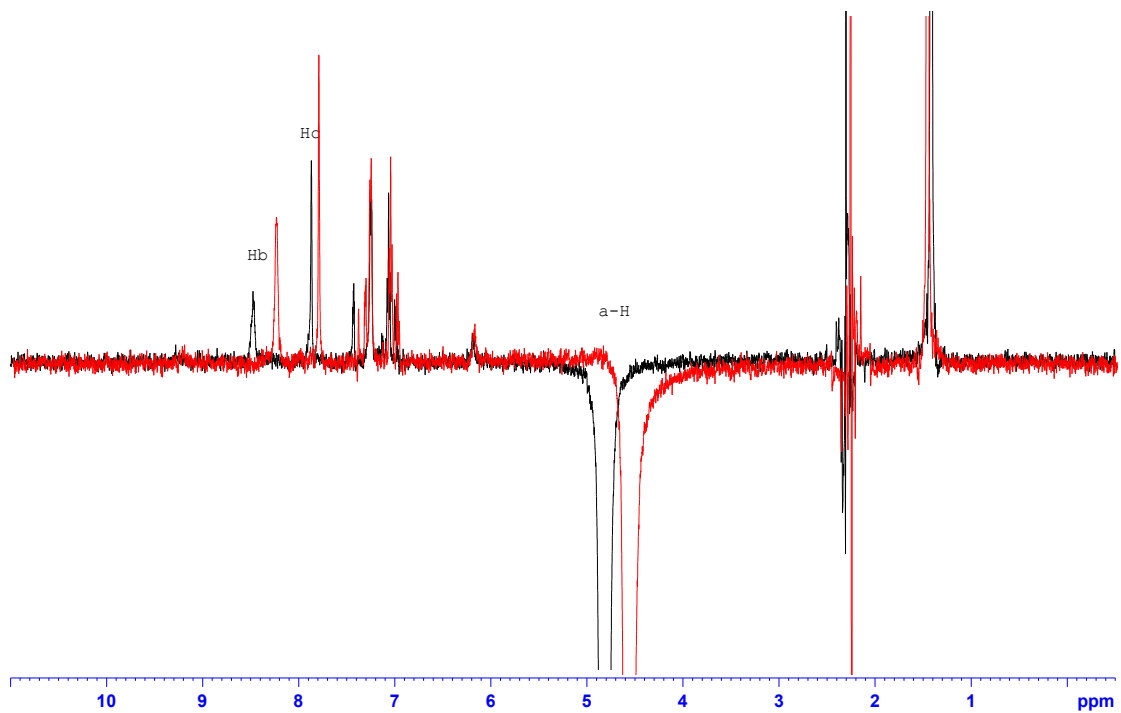

**Computational models of complexes.**

**Ball-cylinder model for (*R*)-CSA 1/*L*-Pht-Ala/DABCO complex and cartesian coordinates**

(Gaussian 09).

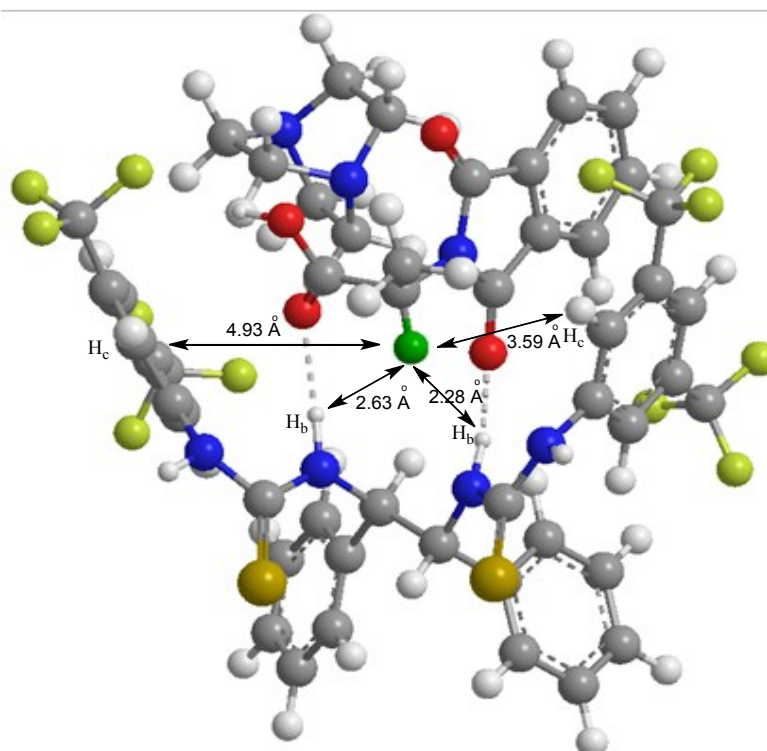

The distances between  $\alpha$ -H of L-Pht-Ala and Ar-Hs and N-Hs of CSA 1 have been marked.

|   |              |              |              |
|---|--------------|--------------|--------------|
| C | 0.171534000  | -1.312610000 | -2.043635000 |
| C | -1.308569000 | -1.354826000 | -1.675182000 |
| O | -1.799885000 | -0.604777000 | -0.858186000 |
| O | -1.984188000 | -2.306956000 | -2.299634000 |
| N | 0.868676000  | -2.046029000 | -0.992756000 |
| H | 0.050377000  | -1.135948000 | -4.181412000 |
| H | 0.480766000  | -0.263155000 | -1.927763000 |
| C | 1.322134000  | -1.430924000 | 0.169520000  |
| C | -0.142129000 | 2.842862000  | -0.018100000 |
| C | 1.163356000  | 3.339840000  | -0.666208000 |
| N | 1.768192000  | 2.202390000  | -1.350715000 |
| C | 2.622916000  | 2.321530000  | -2.385373000 |
| N | 3.305952000  | 1.145698000  | -2.691988000 |
| C | 3.821865000  | 0.257347000  | -1.725428000 |
| C | 3.969118000  | -1.090967000 | -2.060015000 |
| C | 4.463902000  | -1.995892000 | -1.124274000 |
| C | 4.809962000  | -1.584845000 | 0.158143000  |
| C | 4.981179000  | 0.237144000  | 1.872274000  |
| F | 3.850065000  | 0.473995000  | 2.575749000  |
| F | 5.678726000  | -0.670092000 | 2.567839000  |
| F | 5.673483000  | 1.378766000  | 1.870646000  |
| C | 4.568905000  | -3.442130000 | -1.520606000 |

|   |              |              |              |
|---|--------------|--------------|--------------|
| F | 5.513521000  | -3.641152000 | -2.447228000 |
| F | 3.410388000  | -3.877372000 | -2.053395000 |
| F | 4.850558000  | -4.232846000 | -0.478659000 |
| S | 2.852624000  | 3.689838000  | -3.308463000 |
| C | 4.664447000  | -0.237666000 | 0.481499000  |
| C | 4.202382000  | 0.688717000  | -0.446754000 |
| N | -1.071491000 | 2.243652000  | -0.979981000 |
| C | -1.776455000 | 2.882526000  | -1.937004000 |
| N | -2.851238000 | 2.137451000  | -2.423367000 |
| C | -3.706985000 | 1.350330000  | -1.633841000 |
| C | -4.381597000 | 0.278292000  | -2.229191000 |
| C | -5.172506000 | -0.558745000 | -1.451583000 |
| C | -5.321974000 | -0.354053000 | -0.081213000 |
| C | -4.787365000 | 0.996222000  | 1.968339000  |
| F | -5.581838000 | 0.106910000  | 2.578270000  |
| F | -5.269126000 | 2.217377000  | 2.219372000  |
| F | -3.584831000 | 0.926689000  | 2.576827000  |
| C | -5.764355000 | -1.787279000 | -2.074813000 |
| F | -6.843897000 | -2.226310000 | -1.428795000 |
| F | -6.082928000 | -1.613703000 | -3.358524000 |
| F | -4.859410000 | -2.807876000 | -2.041322000 |
| S | -1.454768000 | 4.375858000  | -2.600091000 |
| C | -4.664732000 | 0.728149000  | 0.493019000  |
| C | -3.881635000 | 1.592470000  | -0.266759000 |
| H | 0.134430000  | 1.991926000  | 0.623942000  |
| H | 0.949245000  | 4.097166000  | -1.428229000 |
| C | 2.128839000  | 3.894548000  | 0.366638000  |
| C | -0.854340000 | 3.843952000  | 0.876078000  |
| H | 1.729842000  | 1.313206000  | -0.849837000 |
| H | 3.832007000  | 1.225847000  | -3.557740000 |
| H | -1.323433000 | 1.271796000  | -0.794925000 |
| H | -3.242703000 | 2.530762000  | -3.274093000 |
| H | 3.684426000  | -1.428854000 | -3.057589000 |
| H | 5.170666000  | -2.301213000 | 0.894282000  |
| H | 4.131633000  | 1.744644000  | -0.177388000 |
| H | -4.248558000 | 0.079852000  | -3.294201000 |
| H | -5.941130000 | -1.019267000 | 0.518839000  |
| H | -3.397914000 | 2.449259000  | 0.206804000  |
| N | -1.587786000 | -2.924819000 | 1.215659000  |
| C | -2.953502000 | -3.135511000 | 0.708977000  |
| N | -3.217513000 | -3.370919000 | 3.162572000  |
| C | -3.945543000 | -3.315968000 | 1.894207000  |
| C | -2.523742000 | -2.094263000 | 3.359310000  |
| C | -1.616467000 | -1.776095000 | 2.136165000  |



|   |              |              |              |
|---|--------------|--------------|--------------|
| C | -2.222897000 | -4.441784000 | 3.078694000  |
| C | -1.181625000 | -4.120214000 | 1.970985000  |
| H | -3.226916000 | -2.252440000 | 0.112308000  |
| H | -2.938002000 | -4.017585000 | 0.048618000  |
| H | -4.650285000 | -2.471878000 | 1.956074000  |
| H | -4.537510000 | -4.237880000 | 1.790460000  |
| H | -3.278217000 | -1.309169000 | 3.510310000  |
| H | -1.935675000 | -2.171716000 | 4.286468000  |
| H | -0.581775000 | -1.555629000 | 2.446130000  |
| H | -1.987497000 | -0.908942000 | 1.569128000  |
| H | -1.739691000 | -4.546353000 | 4.061853000  |
| H | -2.755829000 | -5.382122000 | 2.870698000  |
| H | -1.065494000 | -4.953432000 | 1.259377000  |
| H | -0.193117000 | -3.917153000 | 2.410974000  |
| C | 1.810895000  | -2.523762000 | 1.059076000  |
| O | 1.333070000  | -0.232973000 | 0.375407000  |
| C | 0.883288000  | -3.454911000 | -0.871297000 |
| C | 1.601203000  | -3.731492000 | 0.406167000  |
| O | 0.399497000  | -4.230742000 | -1.649191000 |
| H | 2.962667000  | -5.817813000 | 2.672755000  |
| C | 2.006272000  | -4.937809000 | 0.951460000  |
| H | 1.845280000  | -5.874480000 | 0.417437000  |
| H | 3.290804000  | -3.679243000 | 3.856813000  |
| H | 2.570693000  | -1.510110000 | 2.811709000  |
| C | 2.409932000  | -2.463898000 | 2.308626000  |
| H | -2.896724000 | -2.327281000 | -1.954188000 |
| C | 2.811921000  | -3.678053000 | 2.876752000  |
| C | 0.487716000  | -1.819985000 | -3.441865000 |
| C | 2.623505000  | -4.892872000 | 2.205145000  |
| H | 0.086721000  | -2.827148000 | -3.592436000 |
| H | 1.574949000  | -1.843149000 | -3.586644000 |
| C | -0.839948000 | 5.222687000  | 0.654394000  |
| C | -1.580847000 | 6.071593000  | 1.476438000  |
| C | -2.352405000 | 5.554285000  | 2.515680000  |
| C | -2.372136000 | 4.178751000  | 2.744079000  |
| C | -1.615983000 | 3.335142000  | 1.933661000  |
| C | 2.660902000  | 5.175781000  | 0.215043000  |
| C | 3.574379000  | 5.674496000  | 1.143793000  |
| C | 3.971563000  | 4.890165000  | 2.224402000  |
| C | 3.457904000  | 3.601218000  | 2.372793000  |
| C | 2.540011000  | 3.105706000  | 1.448744000  |
| H | -0.256593000 | 5.635946000  | -0.168006000 |
| H | -1.559834000 | 7.146821000  | 1.295372000  |
| H | -2.937330000 | 6.222438000  | 3.149128000  |

|   |              |             |              |
|---|--------------|-------------|--------------|
| H | -2.971381000 | 3.758808000 | 3.553144000  |
| H | -1.623660000 | 2.258317000 | 2.120072000  |
| H | 2.361452000  | 5.778030000 | -0.645118000 |
| H | 3.983591000  | 6.677521000 | 1.016566000  |
| H | 4.688809000  | 5.279103000 | 2.948192000  |
| H | 3.777935000  | 2.972819000 | 3.204250000  |
| H | 2.159635000  | 2.085517000 | 1.562810000  |

Ball-cylinder model for (S)-CSA 1/L-Pht-Ala/DABCO complex and cartesian coordinates (Gaussian 09).

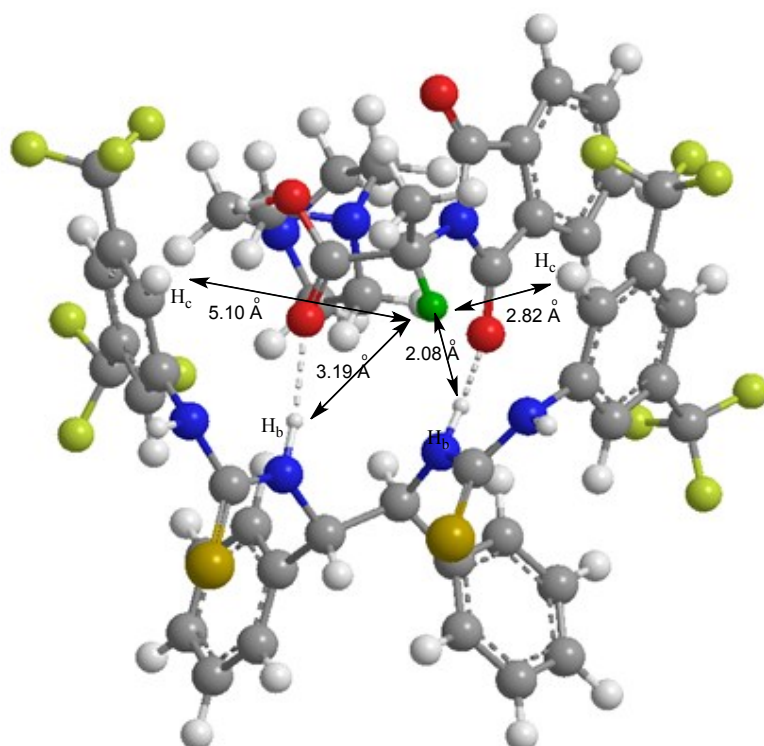

The distances between  $\alpha$ -H of L-Pht-Ala and Ar-Hs and N-Hs of CSA 1 have been marked.

|   |              |              |              |
|---|--------------|--------------|--------------|
| C | 0.635641000  | -1.422848000 | -1.846760000 |
| C | -0.742265000 | -1.577653000 | -1.213262000 |
| O | -1.328056000 | -0.690480000 | -0.628991000 |
| O | -1.213189000 | -2.809793000 | -1.350317000 |
| N | 1.607568000  | -1.954654000 | -0.898159000 |
| H | 0.125702000  | -1.470106000 | -3.933091000 |
| H | 0.823868000  | -0.342697000 | -1.903361000 |
| C | 2.074073000  | -1.189270000 | 0.165285000  |
| C | 1.247456000  | 6.174876000  | 1.004668000  |
| C | -3.615242000 | 2.801386000  | 2.758581000  |
| C | -1.659381000 | 3.219415000  | -0.492198000 |
| C | -0.251969000 | 2.798970000  | -0.033271000 |

|   |              |              |              |
|---|--------------|--------------|--------------|
| C | -3.921108000 | 5.061535000  | 1.970817000  |
| N | 0.562494000  | 2.165641000  | -1.073524000 |
| C | 1.010087000  | 2.728232000  | -2.216978000 |
| N | 2.080707000  | 2.039886000  | -2.783254000 |
| C | 3.119615000  | 1.456650000  | -2.015692000 |
| C | 3.646643000  | 0.227704000  | -2.414579000 |
| C | 4.626111000  | -0.393859000 | -1.642456000 |
| C | 5.092008000  | 0.194009000  | -0.471825000 |
| C | 2.190042000  | 5.761950000  | 1.943681000  |
| C | 5.012982000  | 2.039656000  | 1.209993000  |
| F | 4.167439000  | 1.719965000  | 2.214687000  |
| F | 6.223677000  | 1.600428000  | 1.579332000  |
| F | 5.057431000  | 3.372151000  | 1.151667000  |
| C | 5.151613000  | -1.736143000 | -2.070564000 |
| F | 6.025988000  | -1.637506000 | -3.077766000 |
| F | 4.152696000  | -2.530386000 | -2.502687000 |
| F | 5.761794000  | -2.375221000 | -1.065326000 |
| S | 0.357769000  | 4.043146000  | -3.003983000 |
| C | 4.567532000  | 1.426149000  | -0.088075000 |
| C | 3.601473000  | 2.071592000  | -0.852058000 |
| N | -2.229199000 | 2.134154000  | -1.274878000 |
| C | -3.233684000 | 2.306605000  | -2.149473000 |
| N | -3.745974000 | 1.104163000  | -2.650626000 |
| C | -4.062324000 | 0.009638000  | -1.825898000 |
| C | -4.120561000 | -1.272808000 | -2.386497000 |
| C | -4.403142000 | -2.368702000 | -1.579279000 |
| C | -4.606739000 | -2.226456000 | -0.206102000 |
| C | -4.730196000 | -0.745568000 | 1.812897000  |
| F | -5.261561000 | -1.820624000 | 2.410274000  |
| F | -5.499670000 | 0.306620000  | 2.096748000  |
| F | -3.535726000 | -0.523506000 | 2.410630000  |
| C | -4.435866000 | -3.758276000 | -2.152023000 |
| F | -5.606441000 | -4.364779000 | -1.929139000 |
| F | -4.207214000 | -3.775938000 | -3.467070000 |
| F | -3.490786000 | -4.525726000 | -1.566922000 |
| S | -3.846271000 | 3.767109000  | -2.661582000 |
| C | -4.556332000 | -0.945843000 | 0.334157000  |
| C | -4.318522000 | 0.170715000  | -0.459029000 |
| C | -4.175429000 | 4.069769000  | 2.915786000  |
| C | -2.531518000 | 3.529911000  | 0.713760000  |
| C | 0.542443000  | 3.884770000  | 0.673040000  |
| C | 1.493412000  | 3.476408000  | 1.616565000  |
| C | 0.428677000  | 5.242642000  | 0.366448000  |
| C | 2.315569000  | 4.406411000  | 2.247878000  |

|   |              |              |              |
|---|--------------|--------------|--------------|
| C | -3.106919000 | 4.790821000  | 0.871211000  |
| C | -2.795968000 | 2.536569000  | 1.663806000  |
| H | -0.388641000 | 1.981893000  | 0.692838000  |
| H | -1.610430000 | 4.092698000  | -1.151274000 |
| H | 1.069875000  | 1.354866000  | -0.716950000 |
| H | 2.331590000  | 2.401760000  | -3.699178000 |
| H | -1.860141000 | 1.193023000  | -1.128789000 |
| H | -4.362553000 | 1.255544000  | -3.444268000 |
| H | 1.149147000  | 7.233005000  | 0.758948000  |
| H | -3.819867000 | 2.014048000  | 3.484785000  |
| H | -4.367496000 | 6.050406000  | 2.083366000  |
| H | 3.258362000  | -0.251589000 | -3.314765000 |
| H | 5.841151000  | -0.307695000 | 0.139225000  |
| H | 2.829201000  | 6.495526000  | 2.436803000  |
| H | 3.201991000  | 3.038635000  | -0.536672000 |
| H | -3.922775000 | -1.409827000 | -3.449836000 |
| H | -4.817610000 | -3.091675000 | 0.423278000  |
| H | -4.325059000 | 1.168478000  | -0.016118000 |
| H | -4.816661000 | 4.282008000  | 3.772292000  |
| H | 1.598748000  | 2.411408000  | 1.844069000  |
| H | -0.288260000 | 5.579681000  | -0.382025000 |
| H | 3.055550000  | 4.068292000  | 2.973766000  |
| H | -2.928312000 | 5.556930000  | 0.114467000  |
| H | -2.372163000 | 1.535466000  | 1.538806000  |
| N | -0.104255000 | -2.684839000 | 1.894859000  |
| C | -1.501722000 | -3.115509000 | 1.719744000  |
| N | -1.239622000 | -3.048856000 | 4.180831000  |
| C | -2.154660000 | -3.418003000 | 3.099740000  |
| C | -0.858983000 | -1.642159000 | 4.018984000  |
| C | -0.111211000 | -1.433720000 | 2.670428000  |
| C | -0.039287000 | -3.878881000 | 4.073587000  |
| C | 0.604718000  | -3.718677000 | 2.667894000  |
| H | -2.029782000 | -2.290753000 | 1.213477000  |
| H | -1.510328000 | -4.002261000 | 1.065343000  |
| H | -3.091863000 | -2.859147000 | 3.230444000  |
| H | -2.386610000 | -4.488674000 | 3.205703000  |
| H | -1.775895000 | -1.037926000 | 4.063124000  |
| H | -0.229186000 | -1.356233000 | 4.874661000  |
| H | 0.936209000  | -1.131665000 | 2.830083000  |
| H | -0.587882000 | -0.659209000 | 2.048975000  |
| H | 0.657935000  | -3.568843000 | 4.866815000  |
| H | -0.321288000 | -4.924122000 | 4.271509000  |
| H | 0.564394000  | -4.654186000 | 2.087604000  |
| H | 1.661989000  | -3.427336000 | 2.752550000  |

|   |              |              |              |
|---|--------------|--------------|--------------|
| C | 3.003326000  | -2.055998000 | 0.935587000  |
| O | 1.779474000  | -0.031982000 | 0.385958000  |
| C | 2.008657000  | -3.304981000 | -0.772684000 |
| C | 2.970846000  | -3.323781000 | 0.371316000  |
| O | 1.641333000  | -4.219967000 | -1.457121000 |
| H | 5.161759000  | -4.864910000 | 2.414279000  |
| C | 3.732580000  | -4.363324000 | 0.878253000  |
| H | 3.694884000  | -5.355923000 | 0.429209000  |
| H | 5.224680000  | -2.609427000 | 3.405364000  |
| H | 3.822651000  | -0.747228000 | 2.447572000  |
| C | 3.801011000  | -1.754816000 | 2.028590000  |
| H | -2.052096000 | -2.875530000 | -0.858918000 |
| C | 4.577903000  | -2.796362000 | 2.547292000  |
| C | 0.741109000  | -2.050507000 | -3.232161000 |
| C | 4.542470000  | -4.077637000 | 1.982848000  |
| H | 0.407941000  | -3.092561000 | -3.221231000 |
| H | 1.786335000  | -2.025813000 | -3.568476000 |
